# Supplementary material
Source: PubMed Central journal article supplement (PMC4312185)

Figure S1

MVPSFLSLSFS LGLWASGLILVLGFLKLIHLLLRRTLAKAMDKFPGPPTHWLFHGHALEIQETGSLD  
MLGFLSRLGLWASGLILILGFLKLLRLLLRQRLARAMDSFPGPPTHWLFHGHALEIQKTGSLD

KVVSWAHQFPYAHPLWFGQFIGFLNIYEPDYAKAVYSRGDPKAPDVYDFFLQWIGRGLLVLEGPKWLQ  
KVVTTWTTQFPYAHPLWVGQFIGFLNIYEPDYAKAVYSRGDPKAPDVYDFFLQWIGKGLLVLDGPKWFQ

HRKLLTPGFHYDVLKPYVAVFTESTRIMLDKWEKAREGKSFDIFCDVGHMALNTLMKCTFGRGDTGL  
HRKLLTPGFHYDVLKPYVAIFADSTRIMLEKWEKKACEGKSFDIFSDVGHMALDNTLMKCTFGKDSGL

GHRDSSYYLAVSDLTLLMQORLVSFQYHNDFIYWLTPHGRRFLRACQVAHDHTDQVIRERKAALQDEK  
NHRDSSYYVAVSELTLLMQORIDSFQYHNDFIYWLTPHGRRFLRACRAAHHTDRVIRQRKAALQDEK

VRKKIQNRRHLDFLDILLGARDEDDIKLSDADLRAEVDTFMFEGHDTTTSGISWFLYCMALYPEHQHR  
EREKIQNRRHLDFLDILLDVRGESGVQLSDTDLRAEVDTFMFEGHDTTTSGISWFLYCMALYPEHQQR

CREEVREILGDQDFFQWDDLKMTYLTMCIKESFRLYPPVPQVYRQLSKPVTFVDGRSLPAGSLISMH  
CREEVREILGDQDSFQWEDLAKMTYLTMCMEKCFRLYPPVPQVYRQLSKPVSFVDGRSLPAGSLISLH

427 ↓ ERR triad ↑ ↑ active site

IYALHRNSAVVPDPEVFD SLRFSTENASKRHPFAFMPFSAGPRNCIGQQFAMSEMKVVTAMCLLRFEF  
IYALHRNSDVVPDPEVFD PLRFSPENSSGRHPYAFI PFSAGPRNCIGQQFAMNEMKVVTALCLLRFEF

422

SLDPSRLPIKMPQLVLRSKNGFHLHLKPLGPGSGK  
SVDPLRLPIKLPQLVLRSKNGIHLYLKPLGPK

human  
rabbit

=> 85% identical

Figure S2

**Meander region:**

|             | <b>PcxFx PE+a</b>       |
|-------------|-------------------------|
| human       | PEVFD <b>S</b> LRF<br>↓ |
| rabbit      | PEVFD <b>P</b> LRF      |
| cat         | SEVFD <b>P</b> LRF      |
| chimpanzee  | PEVFD <b>P</b> LRF      |
| cow         | PEVFD <b>P</b> LRF      |
| elephant    | PEVFD <b>P</b> LRF      |
| gorilla     | --VFD <b>P</b> LRF      |
| hedgehog    | PEVFD <b>P</b> LRF      |
| medaka      | PEVFD <b>P</b> LRF      |
| mouse       | PEVFD <b>P</b> LRF      |
| opossum     | PEVFD <b>P</b> QRF      |
| Orangutan   | PEVFD <b>P</b> LRF      |
| pig         | PEVFD <b>P</b> LRF      |
| platypus    | PEVFD <b>P</b> LRF      |
| rat         | PEVFD <b>P</b> LRF      |
| stickleback | PNVFD <b>P</b> LRF      |
| wallaby     | PEMFD <b>P</b> QRF      |
| hCYP4A11    | PEVFD <b>P</b> FRF      |
| hCYP4A22    | LEVFD <b>P</b> SRF      |
| hCYP4F2     | PEVYD <b>P</b> FRF      |
| hCYP4F3     | PEVYD <b>P</b> FRF      |
| hCYP4F8     | PEVYD <b>P</b> FRF      |
| hCYP4F11    | PEVYD <b>P</b> FRF      |
| hCYP4F12    | PEVYD <b>P</b> FRF      |
| hCYP4F22    | SKVYN <b>P</b> YRF      |
| hCYP4V2     | PEEFQ <b>P</b> ERF      |
| hCYP4X1     | PKVFD <b>P</b> LRF      |
| hCYP4Z1     | PQVFN <b>P</b> LRF      |

**CYP4B1  
isoforms of  
different  
species**

**human  
CYP450  
family 4**

|          |                     |
|----------|---------------------|
| hCYP1A1  | PSEFL <b>P</b> ERF  |
| hCYP1A2  | PSEFR <b>P</b> ERF  |
| hCYP1B1  | PQEFN <b>P</b> EHF  |
| hCYP2A6  | PQDFN <b>P</b> QHF  |
| hCYP2A13 | PQDCS <b>P</b> QHF  |
| hCYP2A7  | PRDFN <b>P</b> QHF  |
| hCYP2B6  | PDAFN <b>P</b> DHF  |
| hCYP2F1  | PQEFN <b>P</b> EHF  |
| hCYP2C9  | PEMFD <b>P</b> HHF  |
| hCYP2C19 | PEMFD <b>P</b> RHF  |
| hCYP2C18 | PEMFD <b>P</b> GHF  |
| hCYP2C8  | PNIFD <b>P</b> GHF  |
| hCYP2E1  | PEKFK <b>P</b> EHF  |
| hCYP2S1  | PEE FN <b>P</b> DRF |
| hCYP2D6  | PFRFH <b>P</b> EHF  |
| hCYP2W1  | PGQFN <b>P</b> GHF  |
| hCYP2J2  | PDTFN <b>P</b> DHF  |
| hCYP3A4  | PEKFL <b>P</b> ERF  |
| hCYP3A7  | PEKFL <b>P</b> ERF  |
| hCYP3A5  | PEE FR <b>P</b> ERF |
| hCYP3A43 | PEKFC <b>P</b> ERF  |
| hCYP5A1  | PETFN <b>P</b> ERF  |
| hCYP26A1 | KEE FN <b>P</b> DRF |
| hCYP26B1 | VNVFD <b>P</b> DRF  |
| hCYP11B1 | PERYN <b>P</b> QRW  |
| hCYP11B2 | PERYN <b>P</b> QRW  |
| hCYP11A1 | PENFD <b>P</b> TRW  |

**other human  
P450 enzymes**

Figure S3

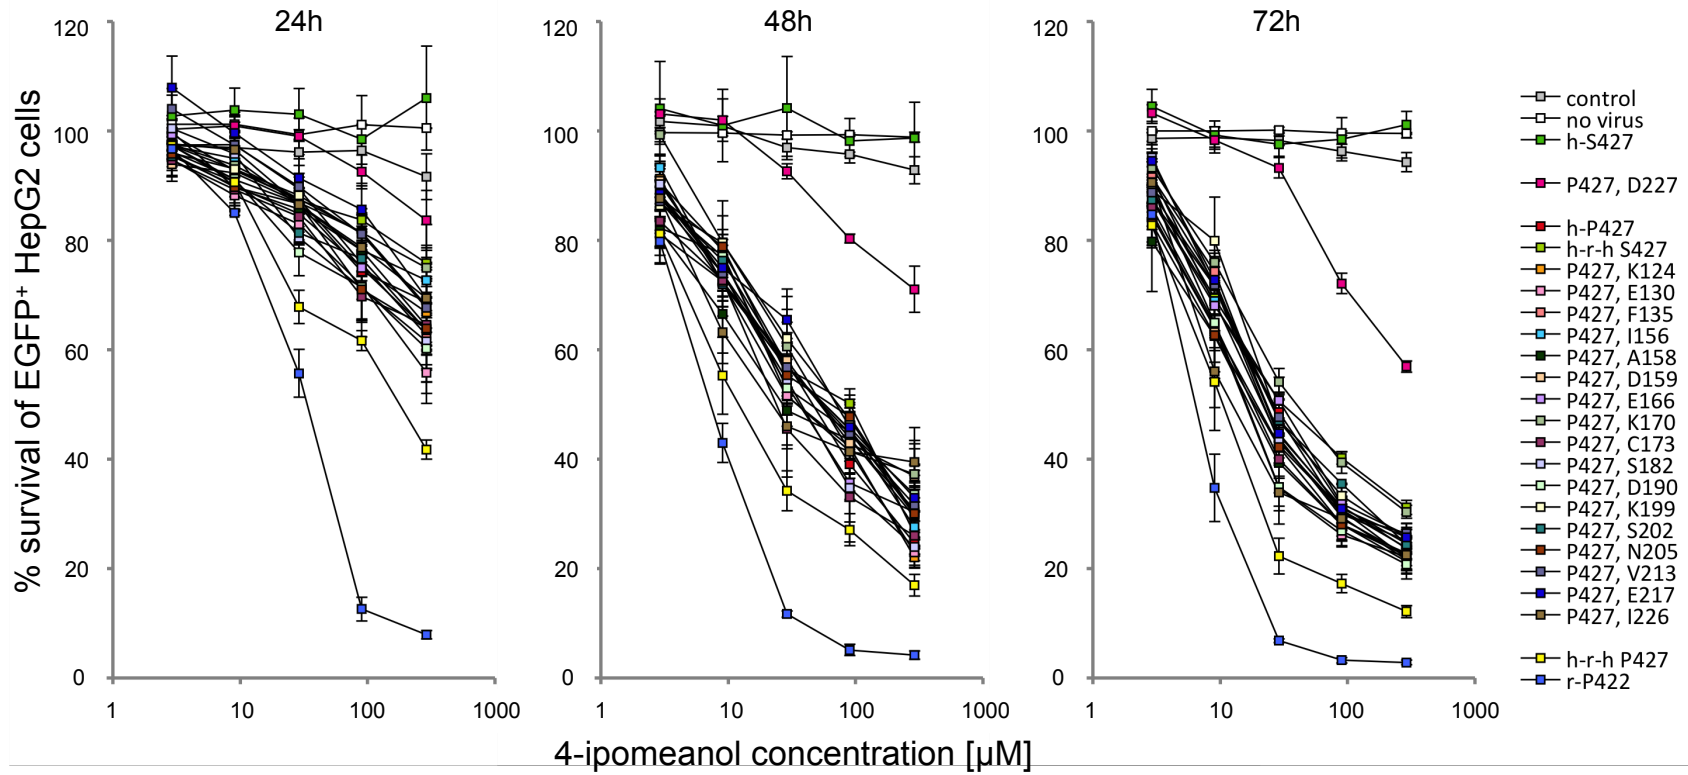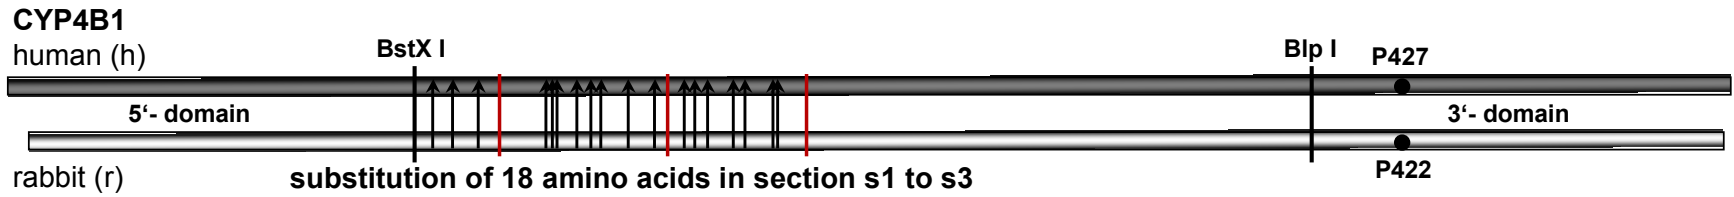

**Figure S4 - Statistical analysis for Figure 2**

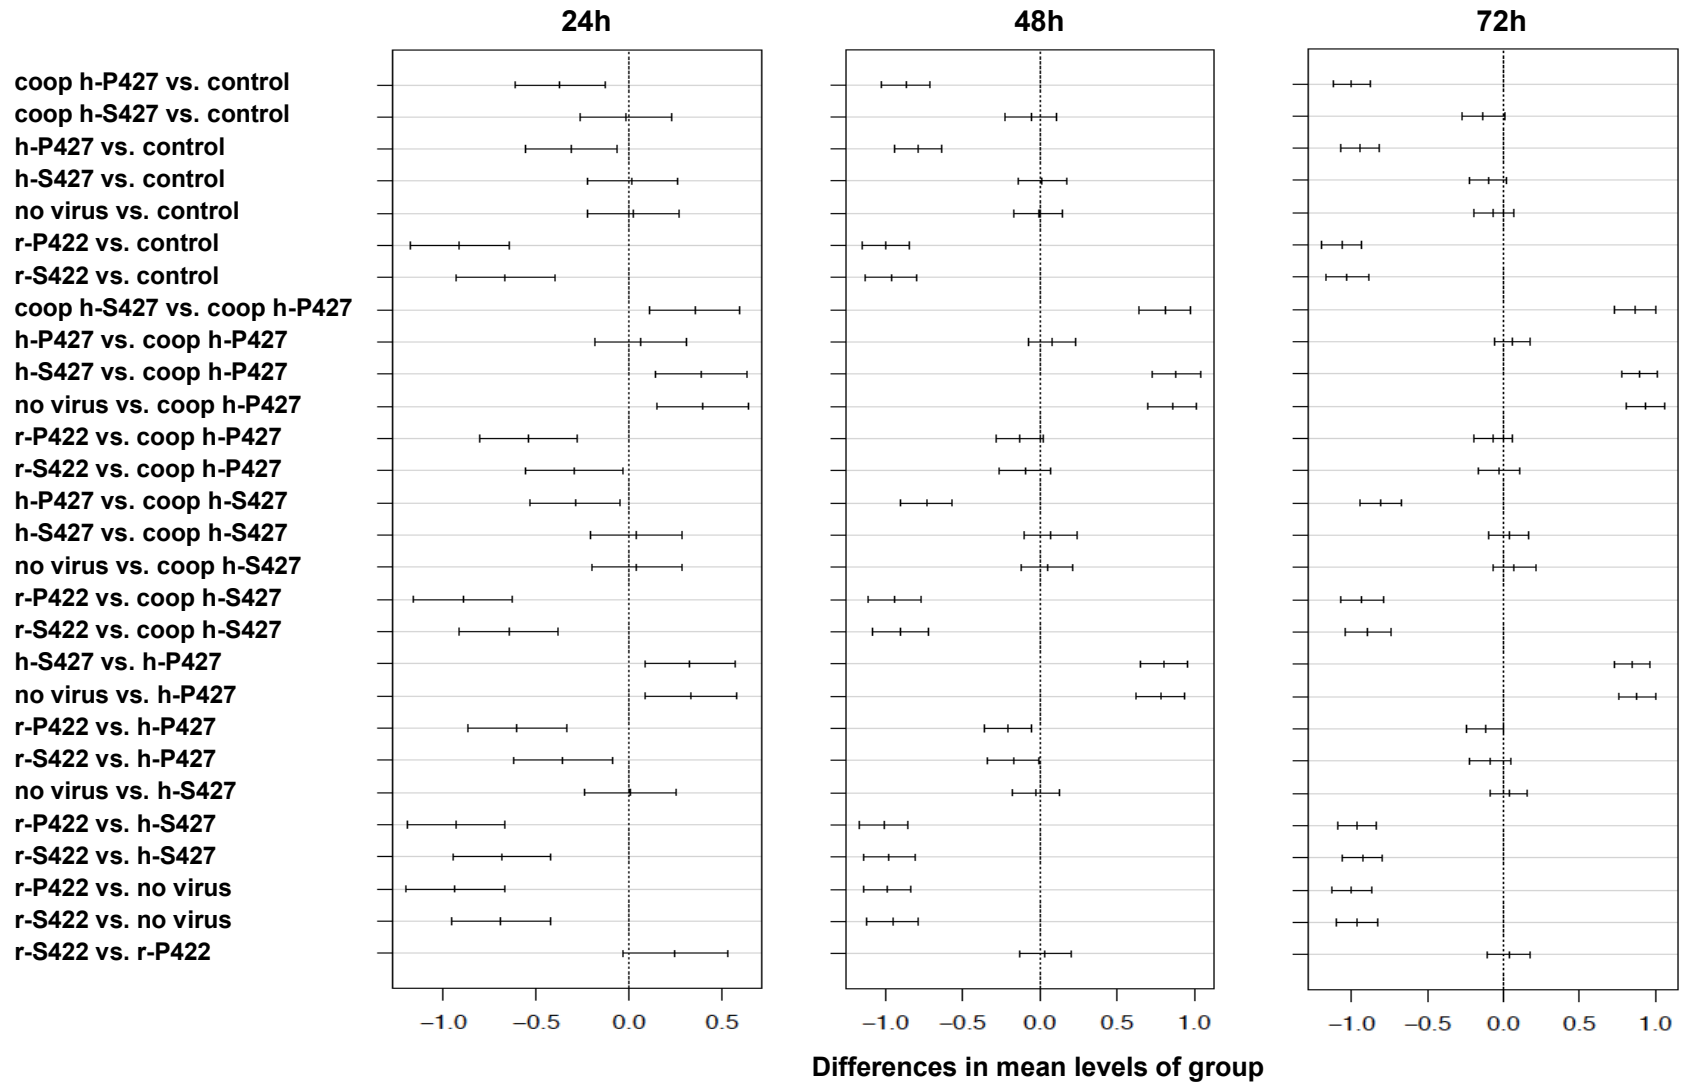

**Figure S5 - Statistical analysis for Figure 3A**

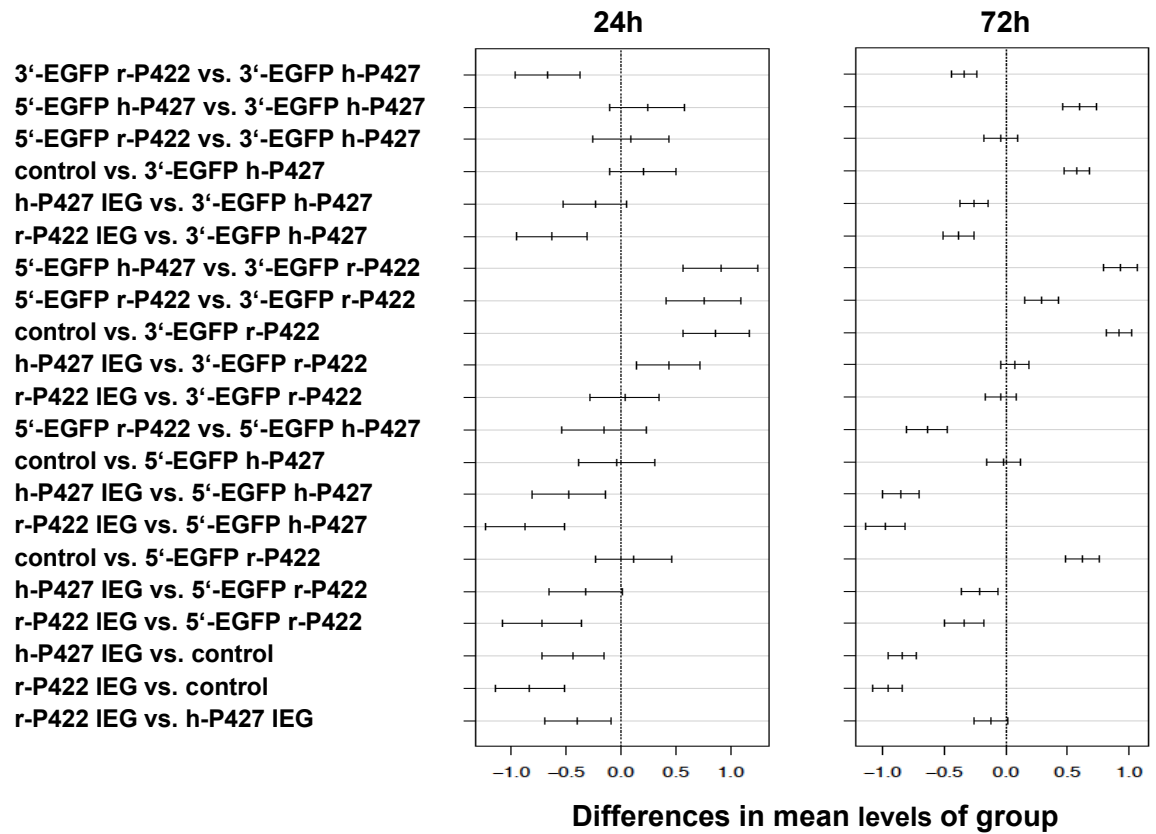

**Figure S6 - Statistical analysis for Figure 4A**

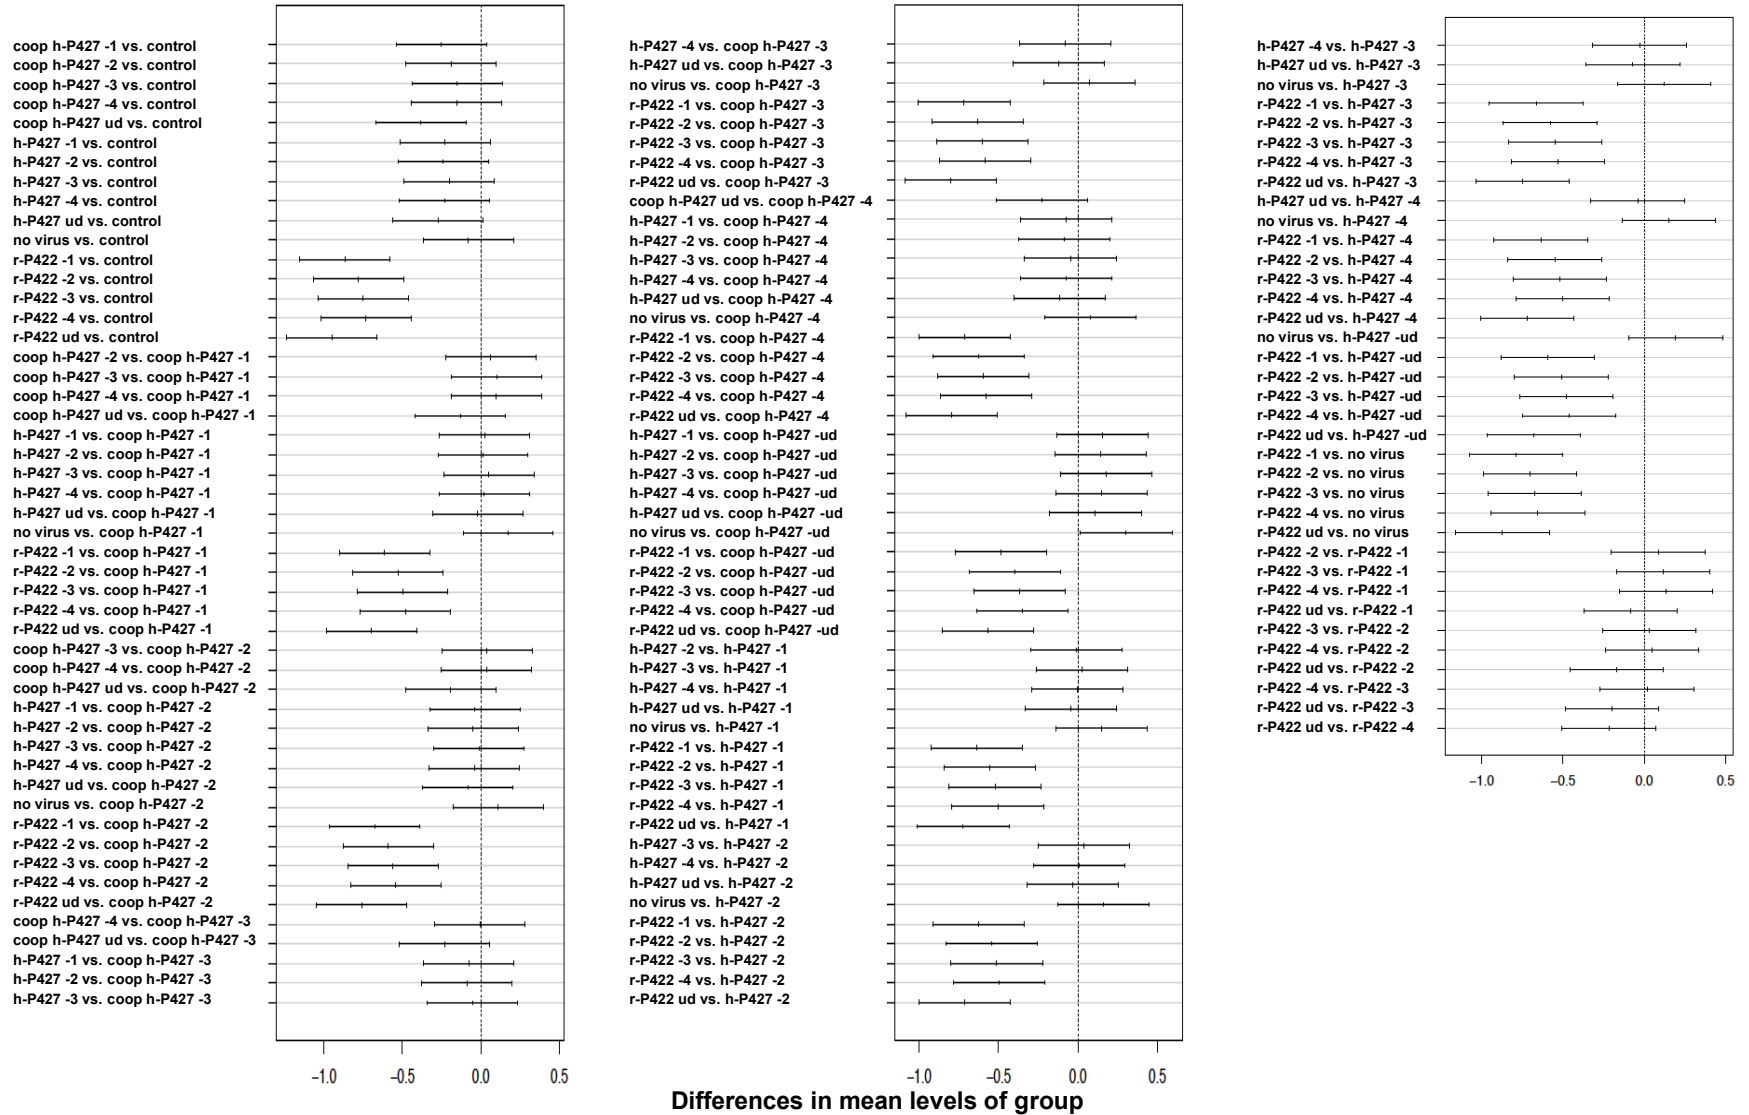

Figure S7 - Statistical analysis for Figure 5A (24h)

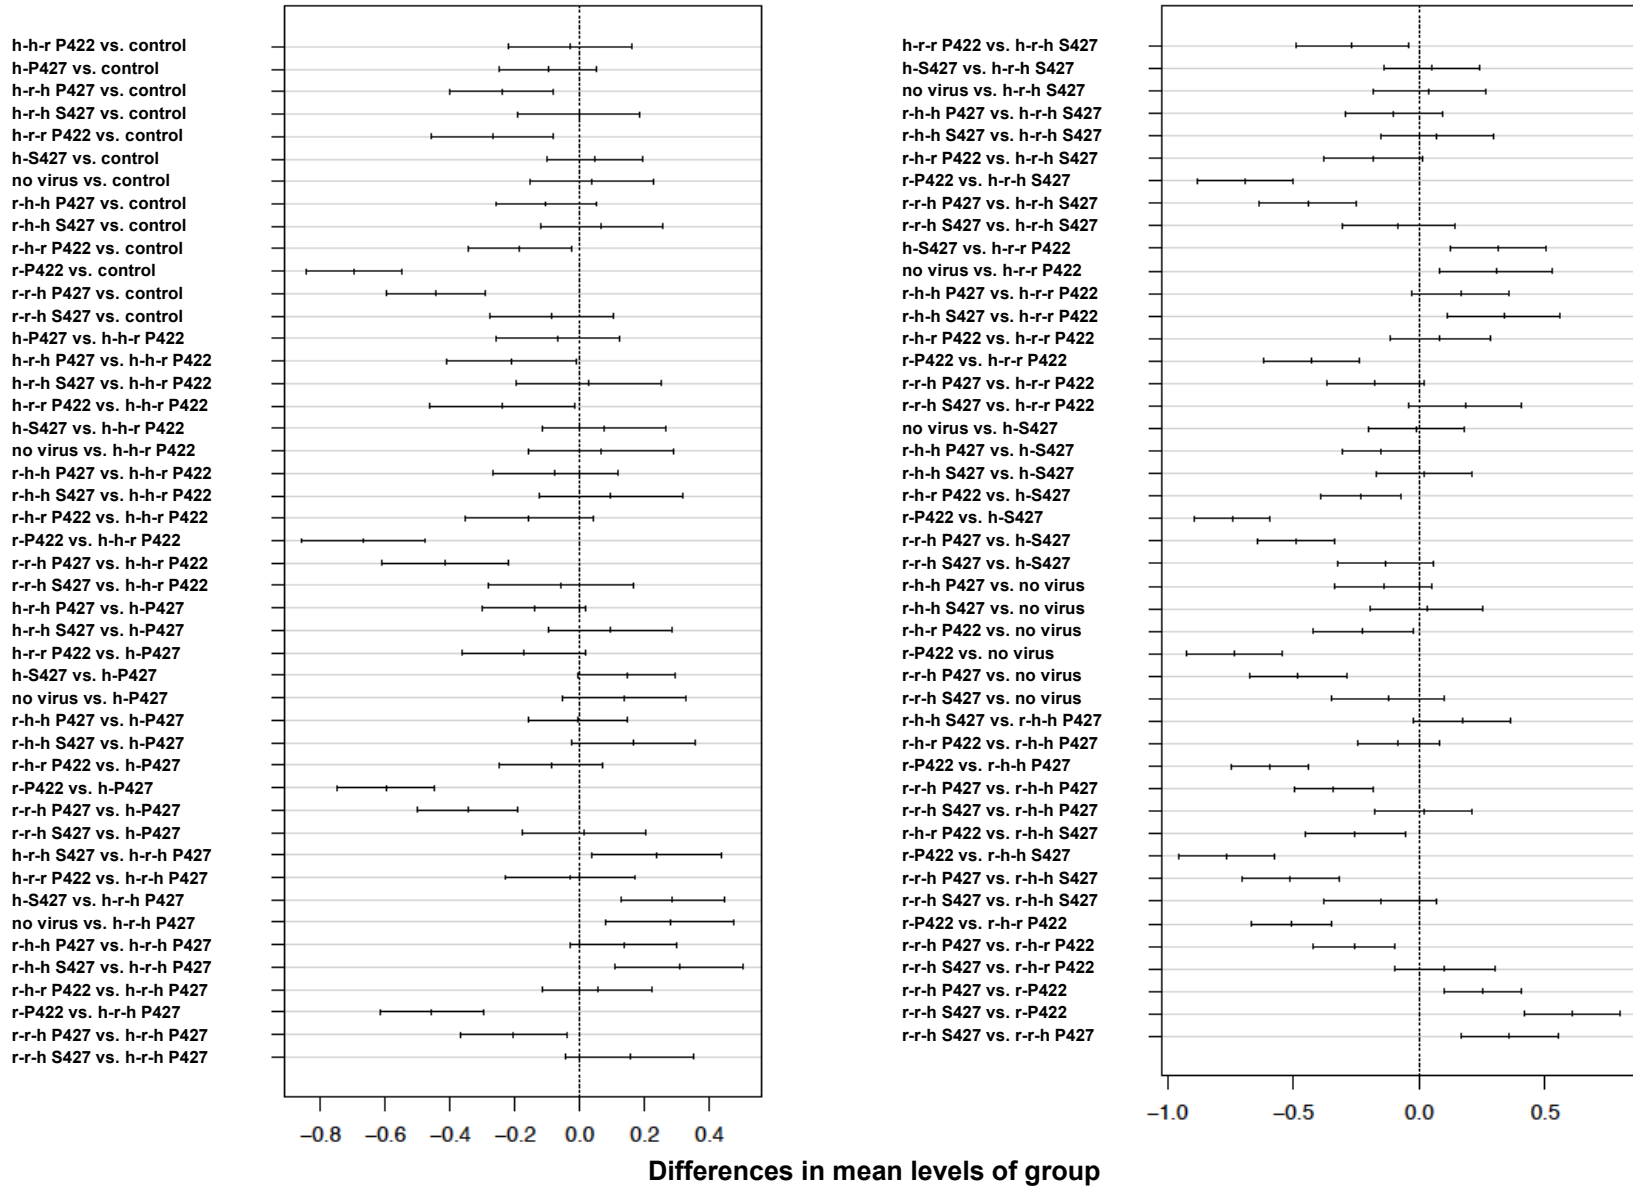

**Figure S8 - Statistical analysis for Figure 5A (48h)**

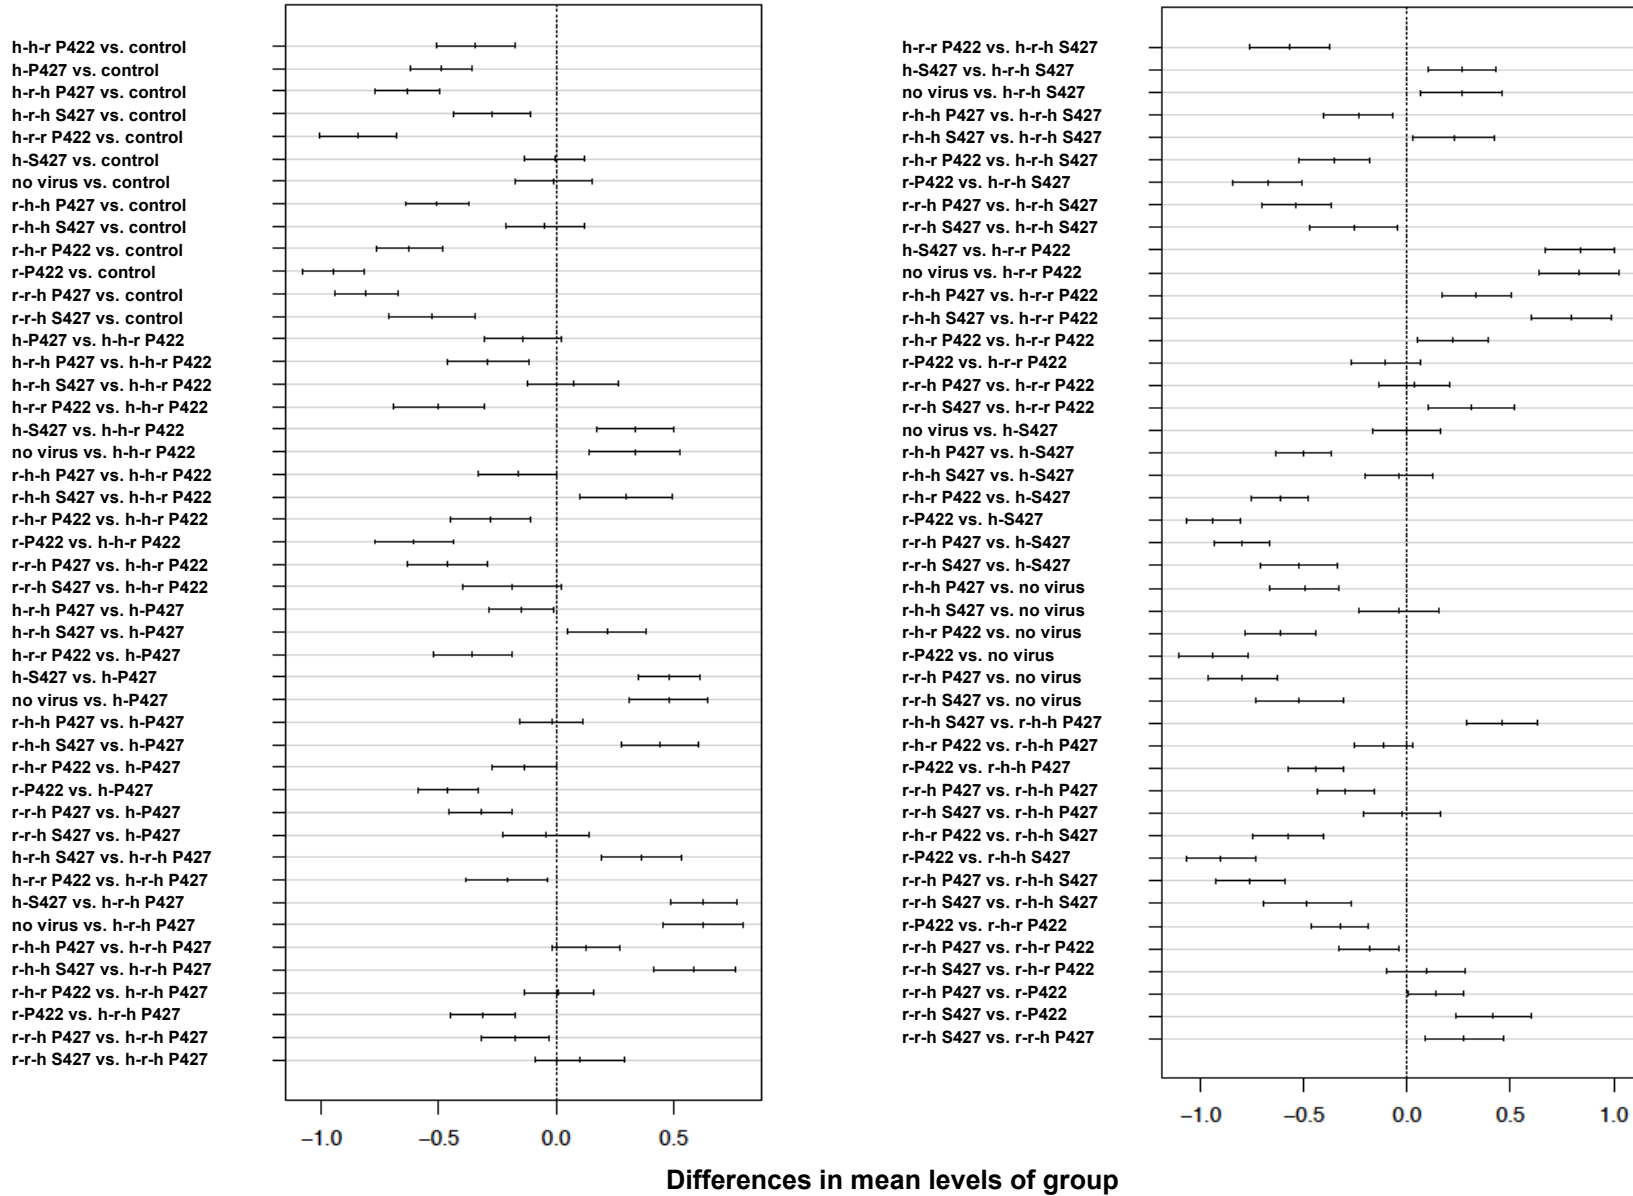



**Figure S9 - Statistical analysis for Figure 5A (72h)**

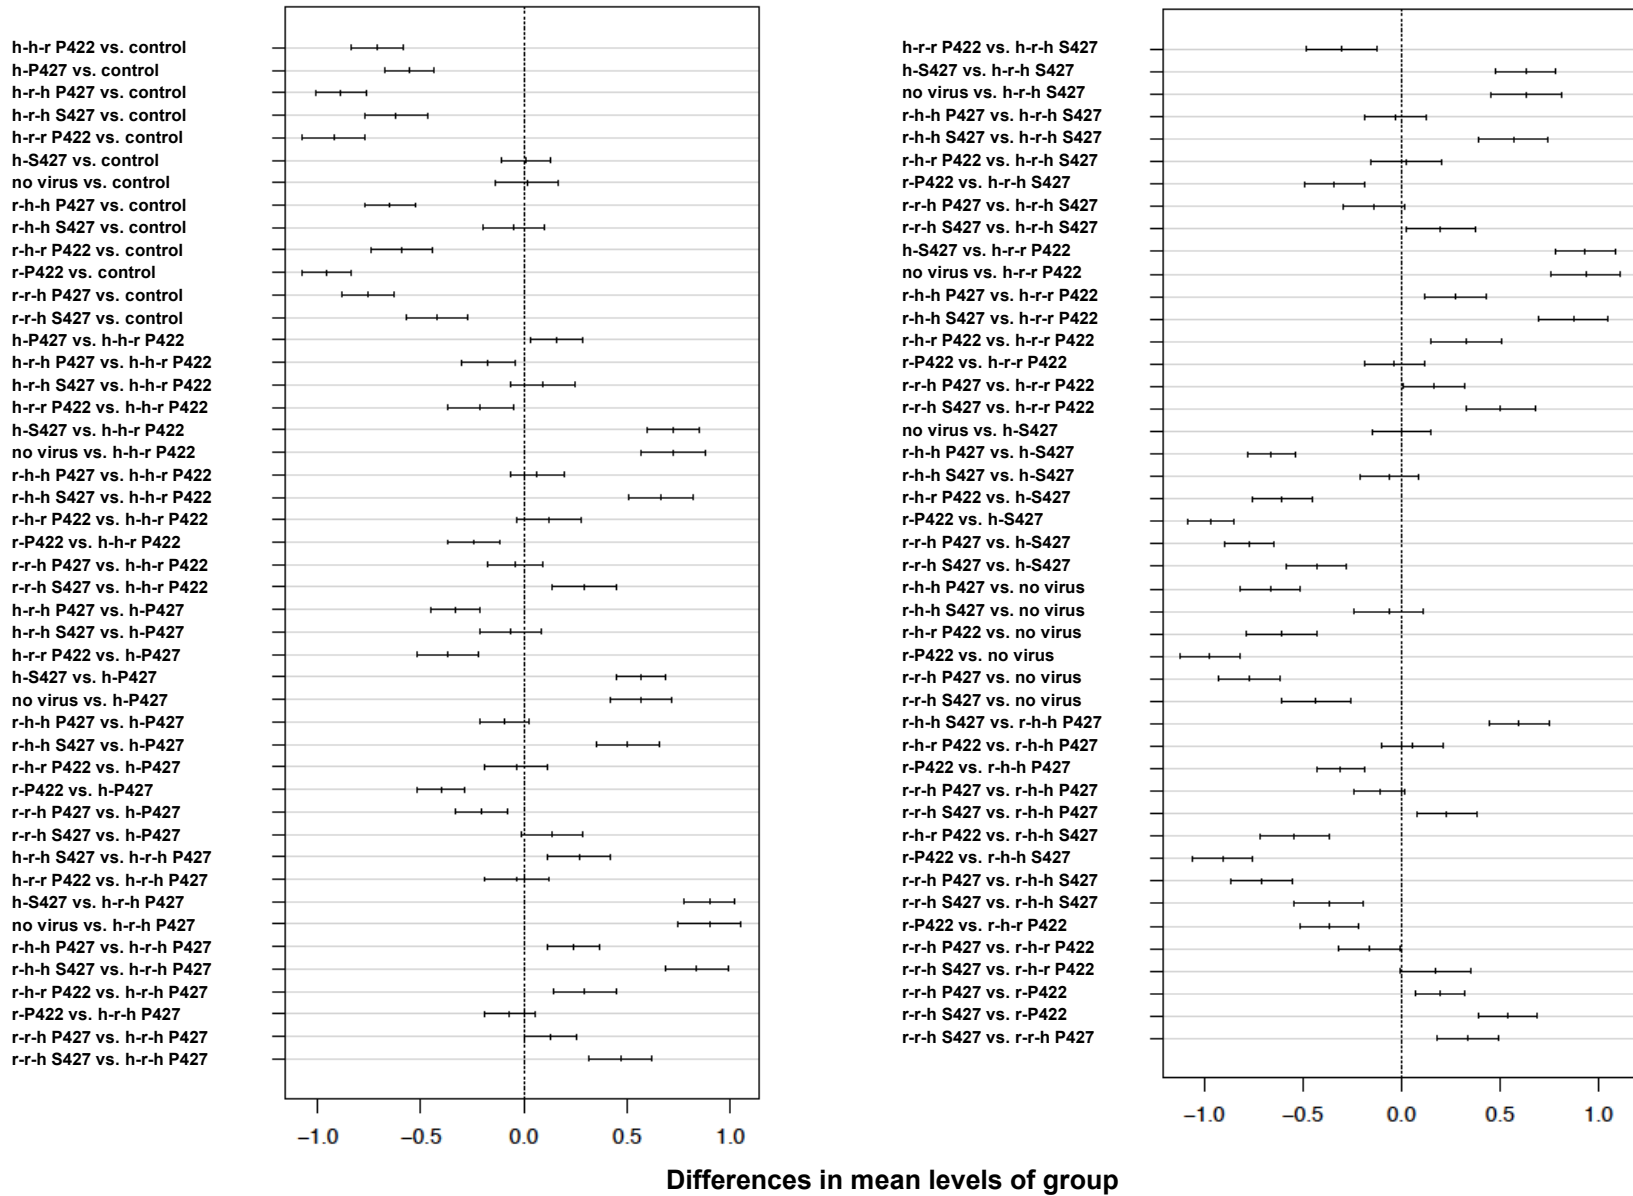

**Figure S10 - Statistical analysis for Figure 5B (24h)**

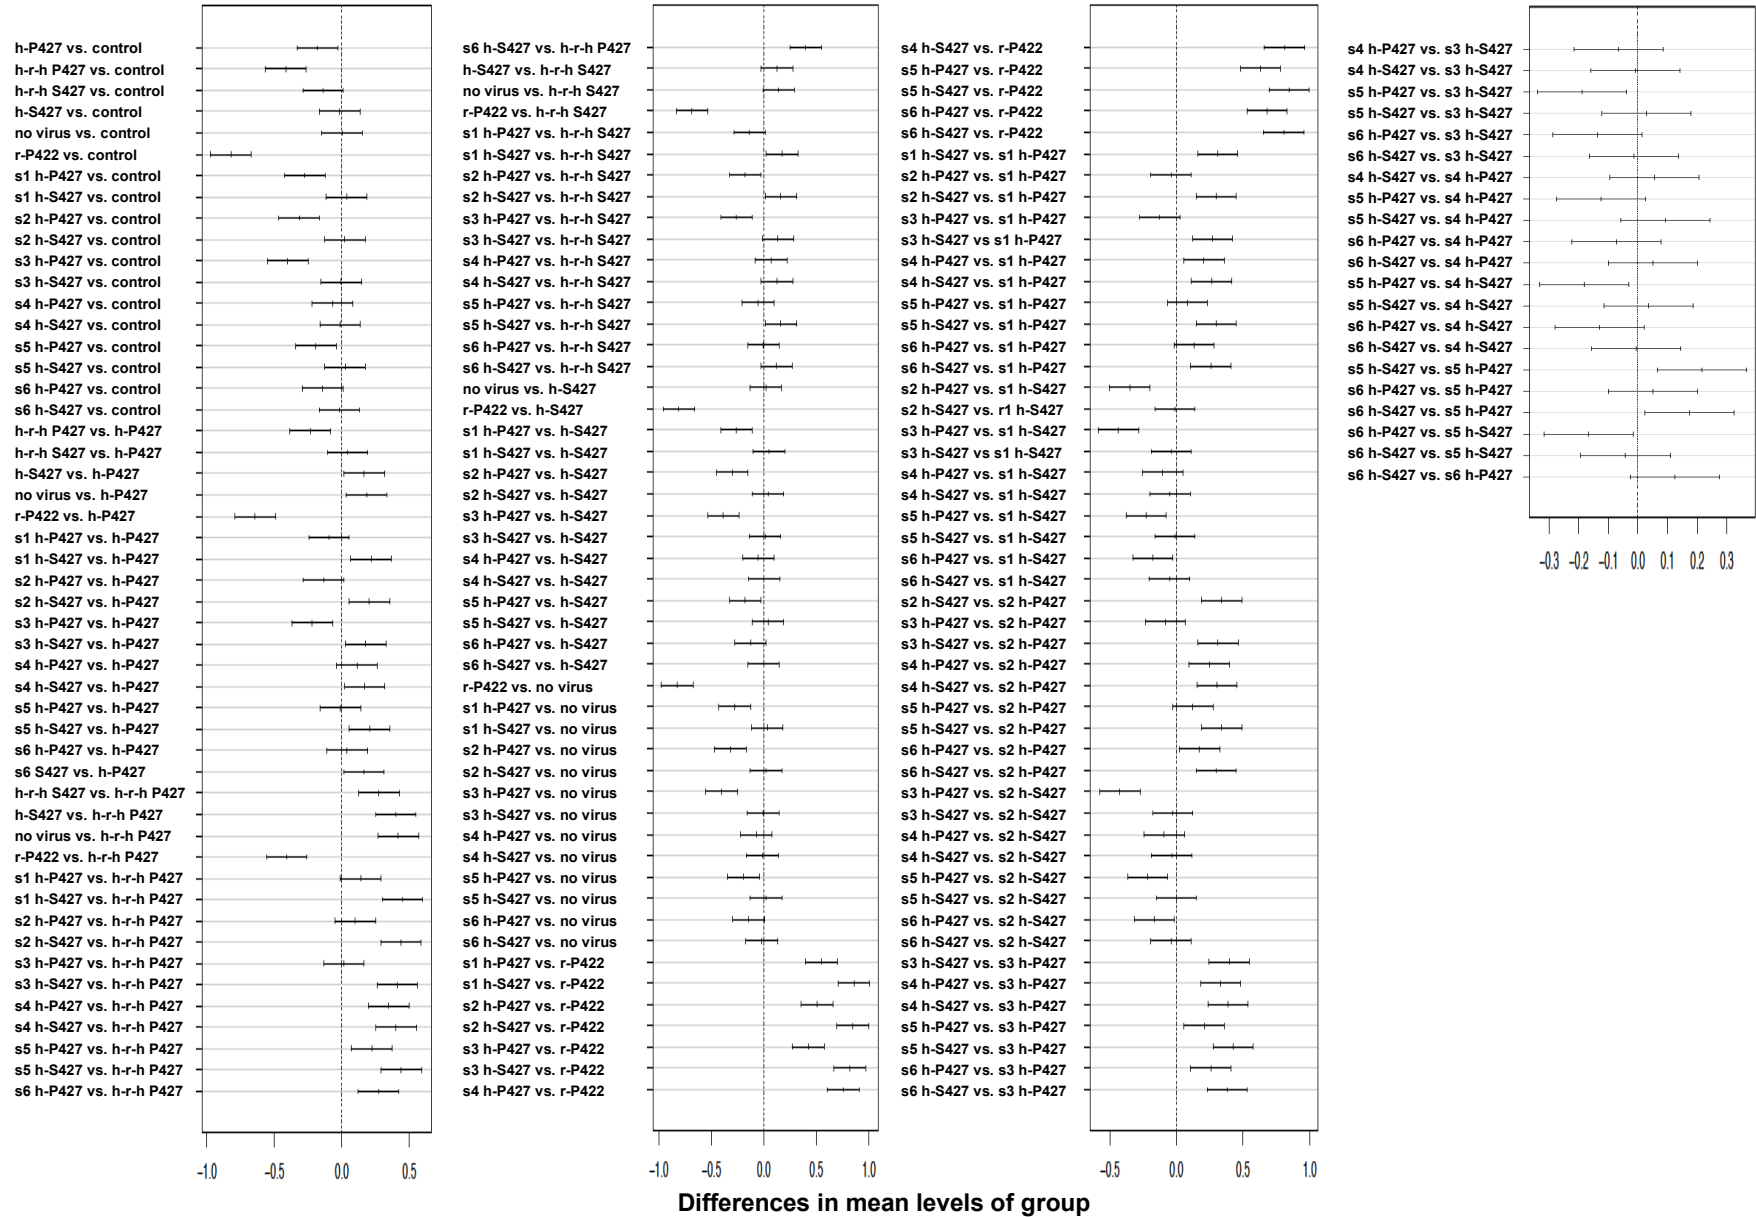

**Figure S11 - Statistical analysis for Figure 5B (48h)**

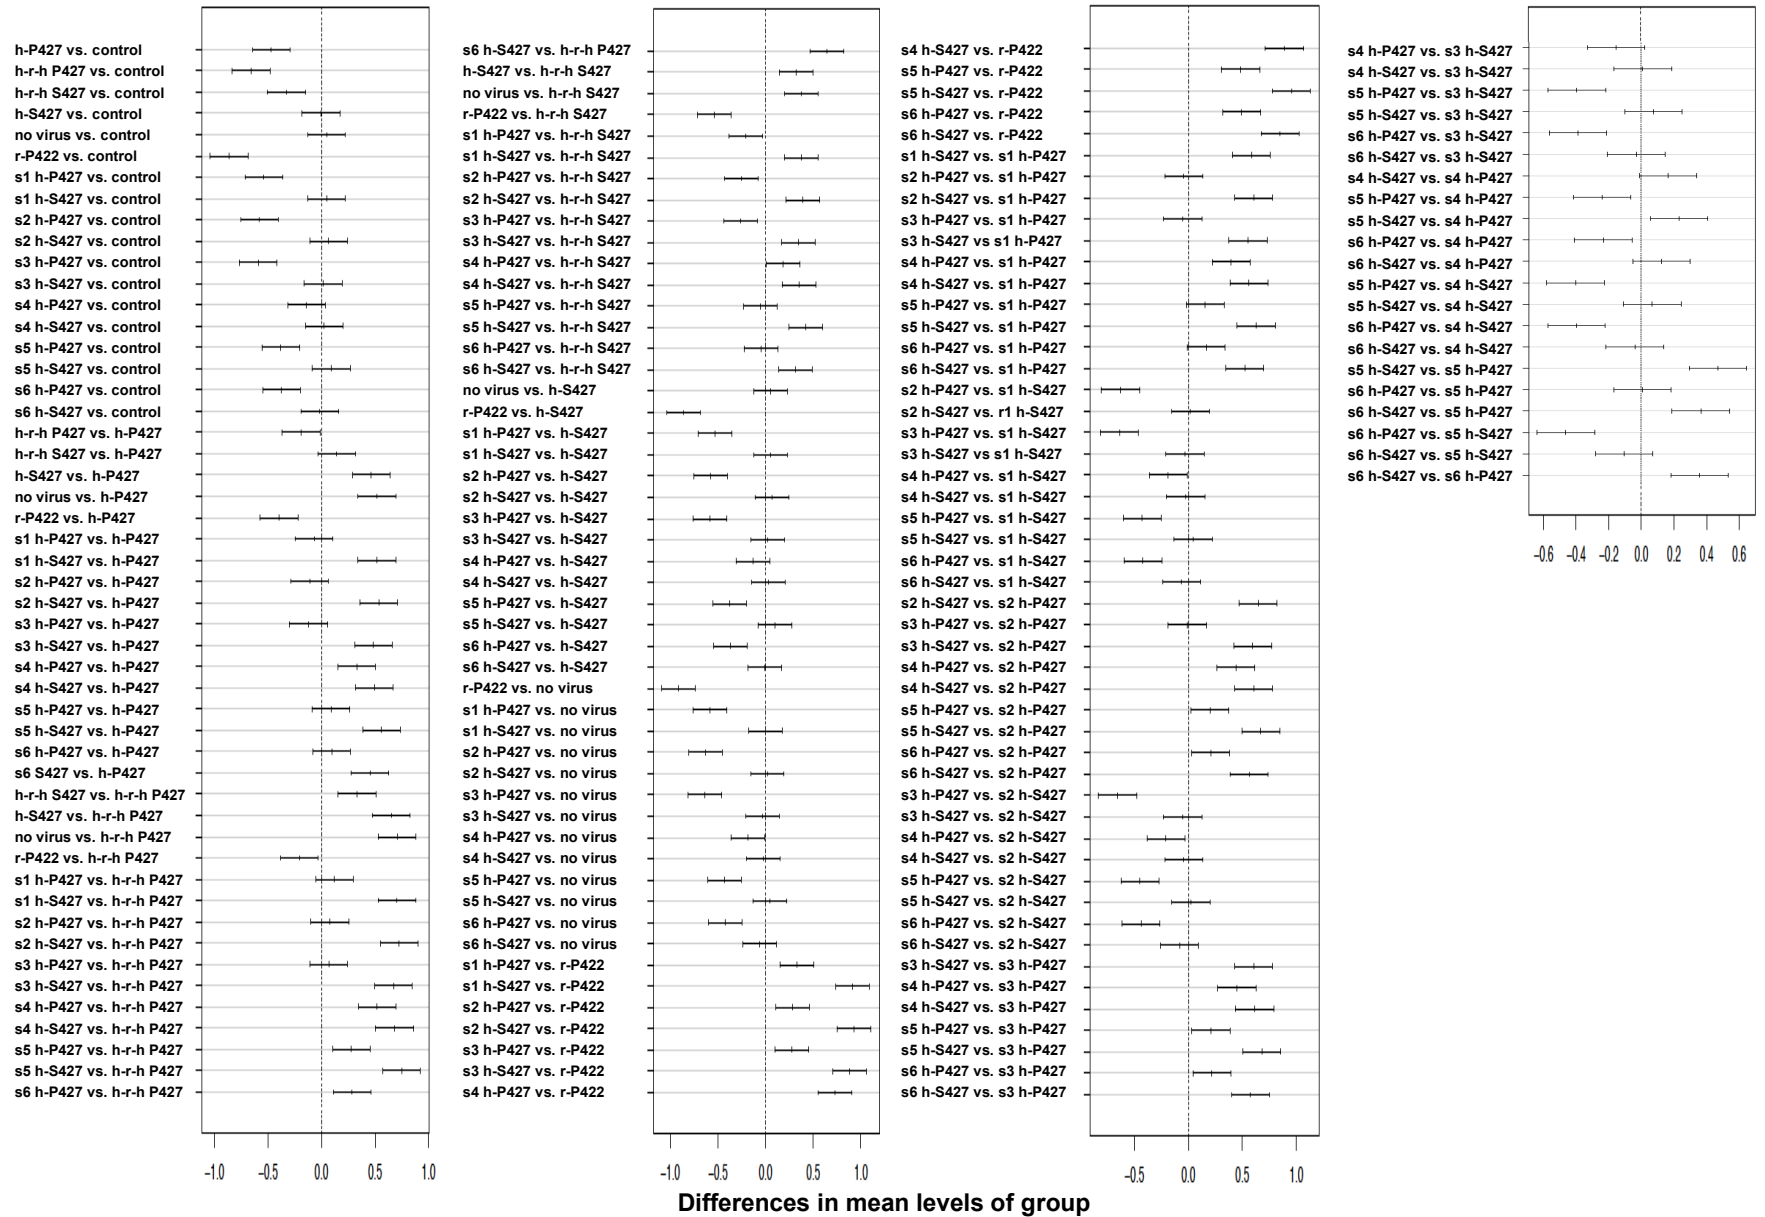

**Figure S12 - Statistical analysis for Figure 5B (72h)**

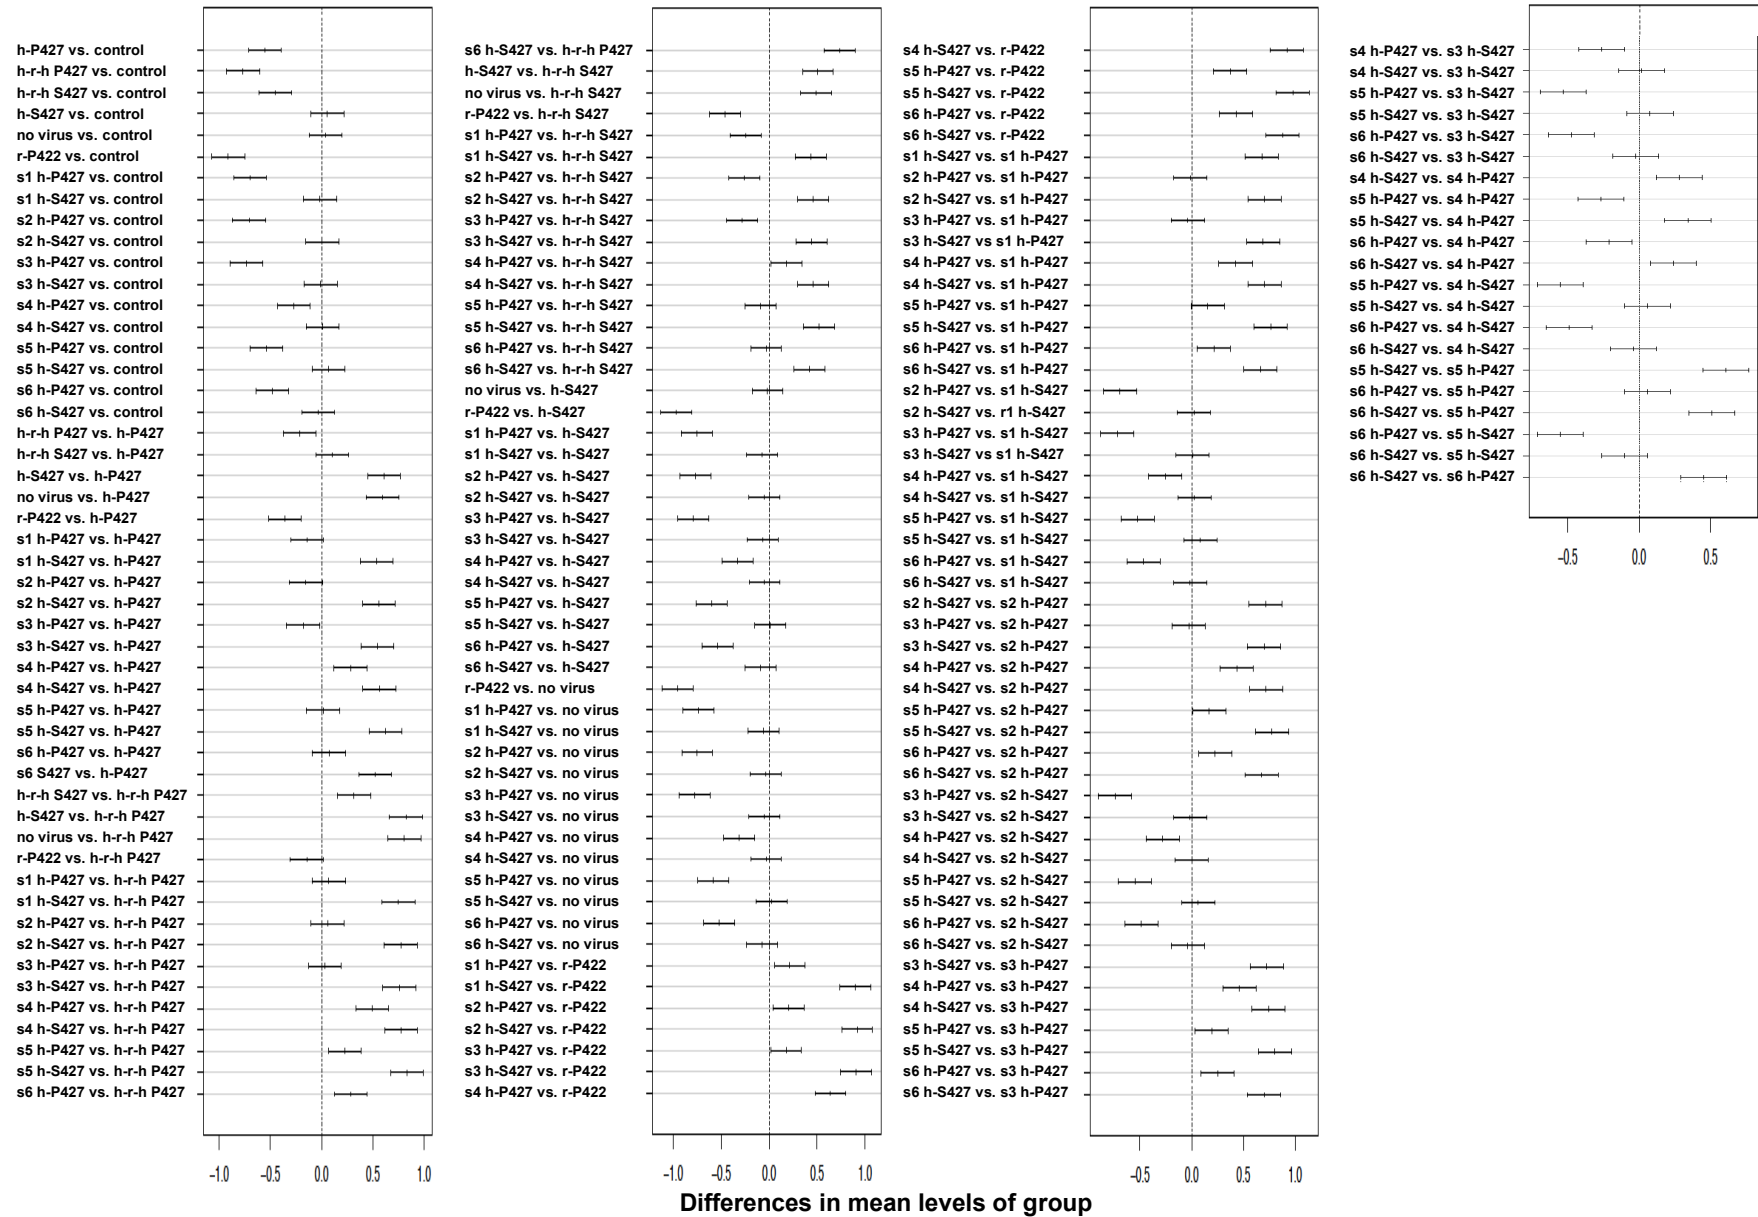

**Figure S13 - Statistical analysis for Figure 5C (24h)**

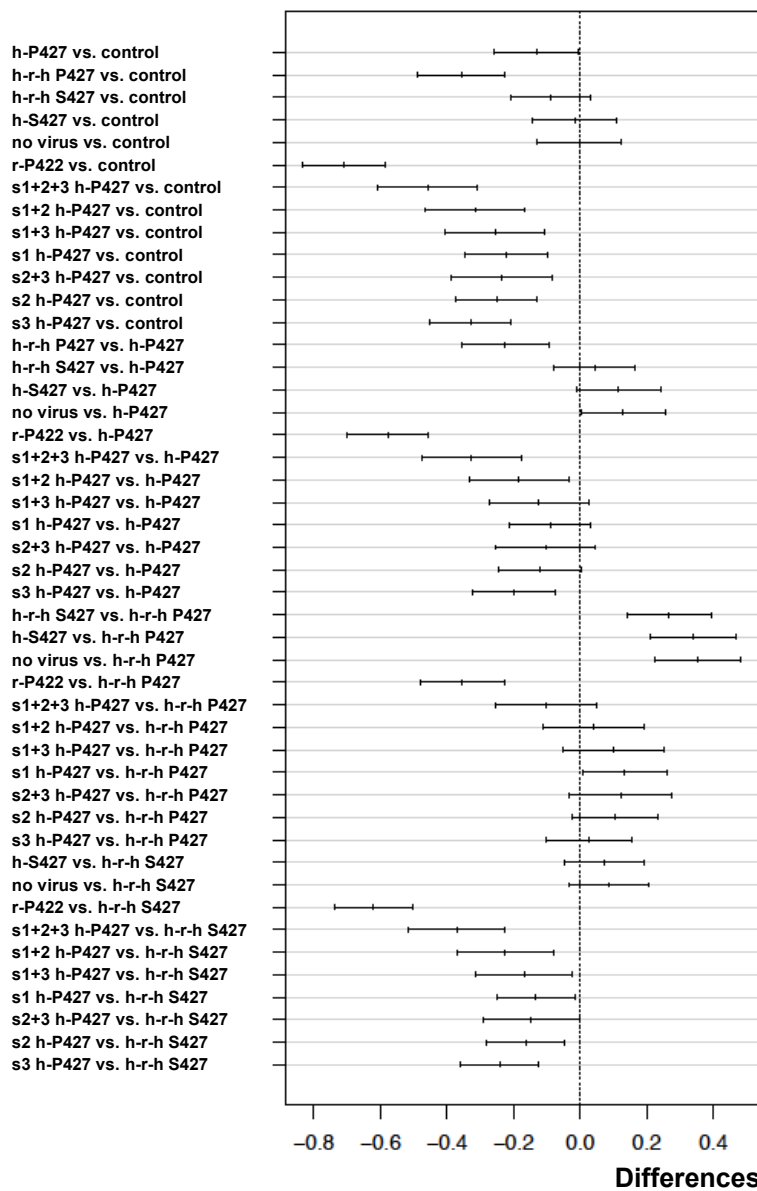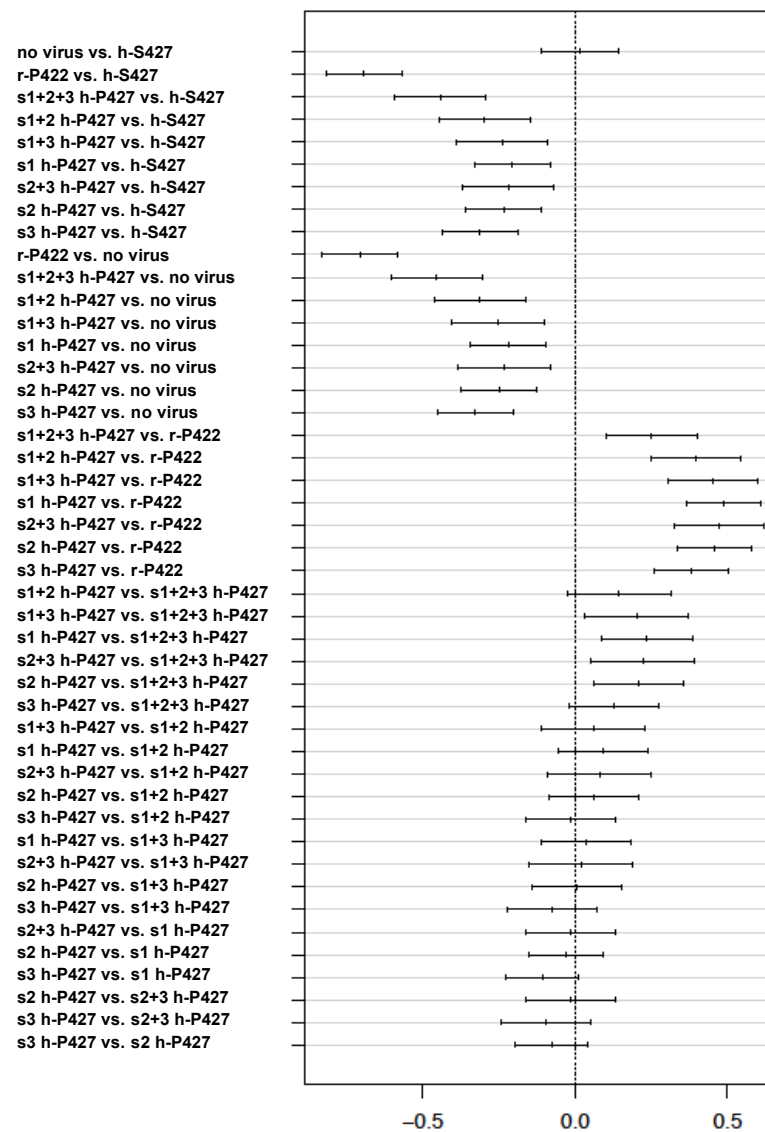

**Figure S14 - Statistical analysis for Figure 5C (48h)**

h-P427 vs. control  
 h-r-h P427 vs. control  
 h-r-h S427 vs. control  
 h-S427 vs. control  
 no virus vs. control  
 r-P422 vs. control  
 s1+2+3 h-P427 vs. control  
 s1+2 h-P427 vs. control  
 s1+3 h-P427 vs. control  
 s1 h-P427 vs. control  
 s2+3 h-P427 vs. control  
 s2 h-P427 vs. control  
 s3 h-P427 vs. control  
 h-r-h P427 vs. h-P427  
 h-r-h S427 vs. h-P427  
 h-S427 vs. h-P427  
 no virus vs. h-P427  
 r-P422 vs. h-P427  
 s1+2+3 h-P427 vs. h-P427  
 s1+2 h-P427 vs. h-P427  
 s1+3 h-P427 vs. h-P427  
 s1 h-P427 vs. h-P427  
 s2+3 h-P427 vs. h-P427  
 s2 h-P427 vs. h-P427  
 s3 h-P427 vs. h-P427  
 h-r-h S427 vs. h-r-h P427  
 h-S427 vs. h-r-h P427  
 no virus vs. h-r-h P427  
 r-P422 vs. h-r-h P427  
 s1+2+3 h-P427 vs. h-r-h P427  
 s1+2 h-P427 vs. h-r-h P427  
 s1+3 h-P427 vs. h-r-h P427  
 s1 h-P427 vs. h-r-h P427  
 s2+3 h-P427 vs. h-r-h P427  
 s2 h-P427 vs. h-r-h P427  
 s3 h-P427 vs. h-r-h P427  
 h-S427 vs. h-r-h S427  
 no virus vs. h-r-h S427  
 r-P422 vs. h-r-h S427  
 s1+2+3 h-P427 vs. h-r-h S427  
 s1+2 h-P427 vs. h-r-h S427  
 s1+3 h-P427 vs. h-r-h S427  
 s1 h-P427 vs. h-r-h S427  
 s2+3 h-P427 vs. h-r-h S427  
 s2 h-P427 vs. h-r-h S427  
 s3 h-P427 vs. h-r-h S427

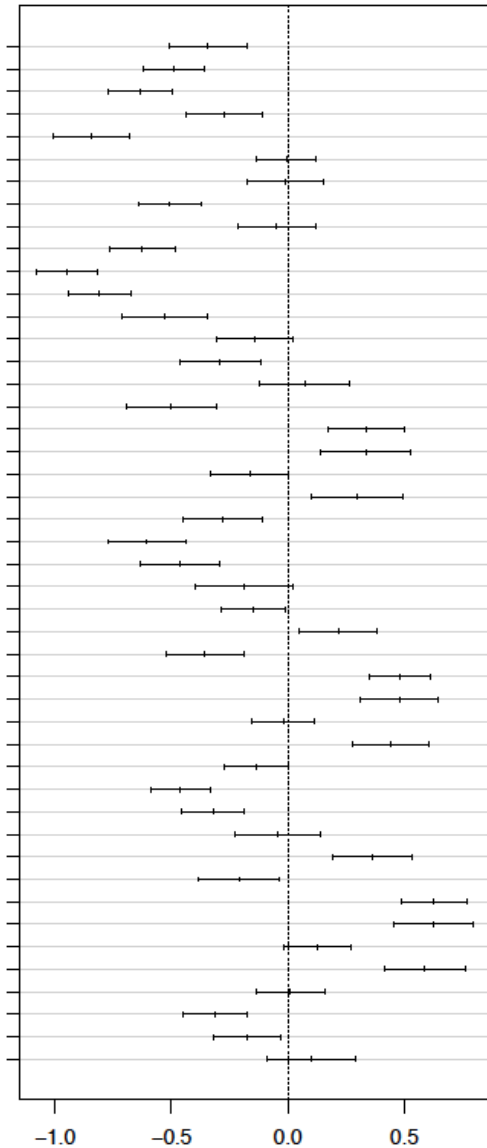

no virus vs. h-S427  
 r-P422 vs. h-S427  
 s1+2+3 h-P427 vs. h-S427  
 s1+2 h-P427 vs. h-S427  
 s1+3 h-P427 vs. h-S427  
 s1 h-P427 vs. h-S427  
 s2+3 h-P427 vs. h-S427  
 s2 h-P427 vs. h-S427  
 s3 h-P427 vs. h-S427  
 r-P422 vs. no virus  
 s1+2+3 h-P427 vs. no virus  
 s1+2 h-P427 vs. no virus  
 s1+3 h-P427 vs. no virus  
 s1 h-P427 vs. no virus  
 s2+3 h-P427 vs. no virus  
 s2 h-P427 vs. no virus  
 s3 h-P427 vs. no virus  
 s1+2+3 h-P427 vs. r-P422  
 s1+2 h-P427 vs. r-P422  
 s1+3 h-P427 vs. r-P422  
 s1 h-P427 vs. r-P422  
 s2+3 h-P427 vs. r-P422  
 s2 h-P427 vs. r-P422  
 s3 h-P427 vs. r-P422  
 s1+2 h-P427 vs. s1+2+3 h-P427  
 s1+3 h-P427 vs. s1+2+3 h-P427  
 s1 h-P427 vs. s1+2+3 h-P427  
 s2+3 h-P427 vs. s1+2+3 h-P427  
 s2 h-P427 vs. s1+2+3 h-P427  
 s3 h-P427 vs. s1+2+3 h-P427  
 s1+3 h-P427 vs. s1+2 h-P427  
 s1 h-P427 vs. s1+2 h-P427  
 s2+3 h-P427 vs. s1+2 h-P427  
 s2 h-P427 vs. s1+2 h-P427  
 s3 h-P427 vs. s1+2 h-P427  
 s1 h-P427 vs. s1+3 h-P427  
 s2+3 h-P427 vs. s1+3 h-P427  
 s2 h-P427 vs. s1+3 h-P427  
 s3 h-P427 vs. s1+3 h-P427  
 s2+3 h-P427 vs. s1 h-P427  
 s2 h-P427 vs. s1 h-P427  
 s3 h-P427 vs. s1 h-P427  
 s2 h-P427 vs. s2+3 h-P427  
 s3 h-P427 vs. s2+3 h-P427  
 s3 h-P427 vs. s2 h-P427

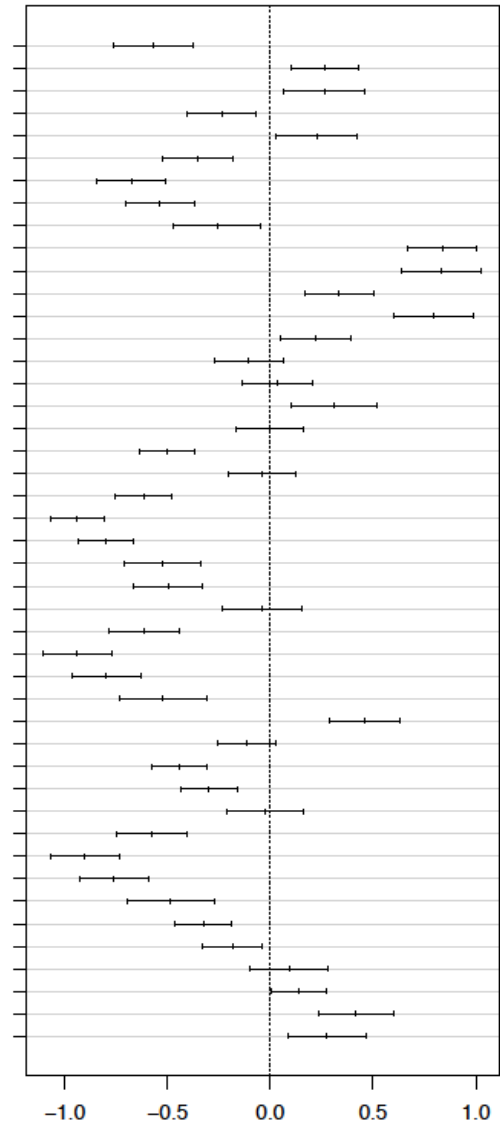

Figure S15 - Statistical analysis for Figure 5C (72h)

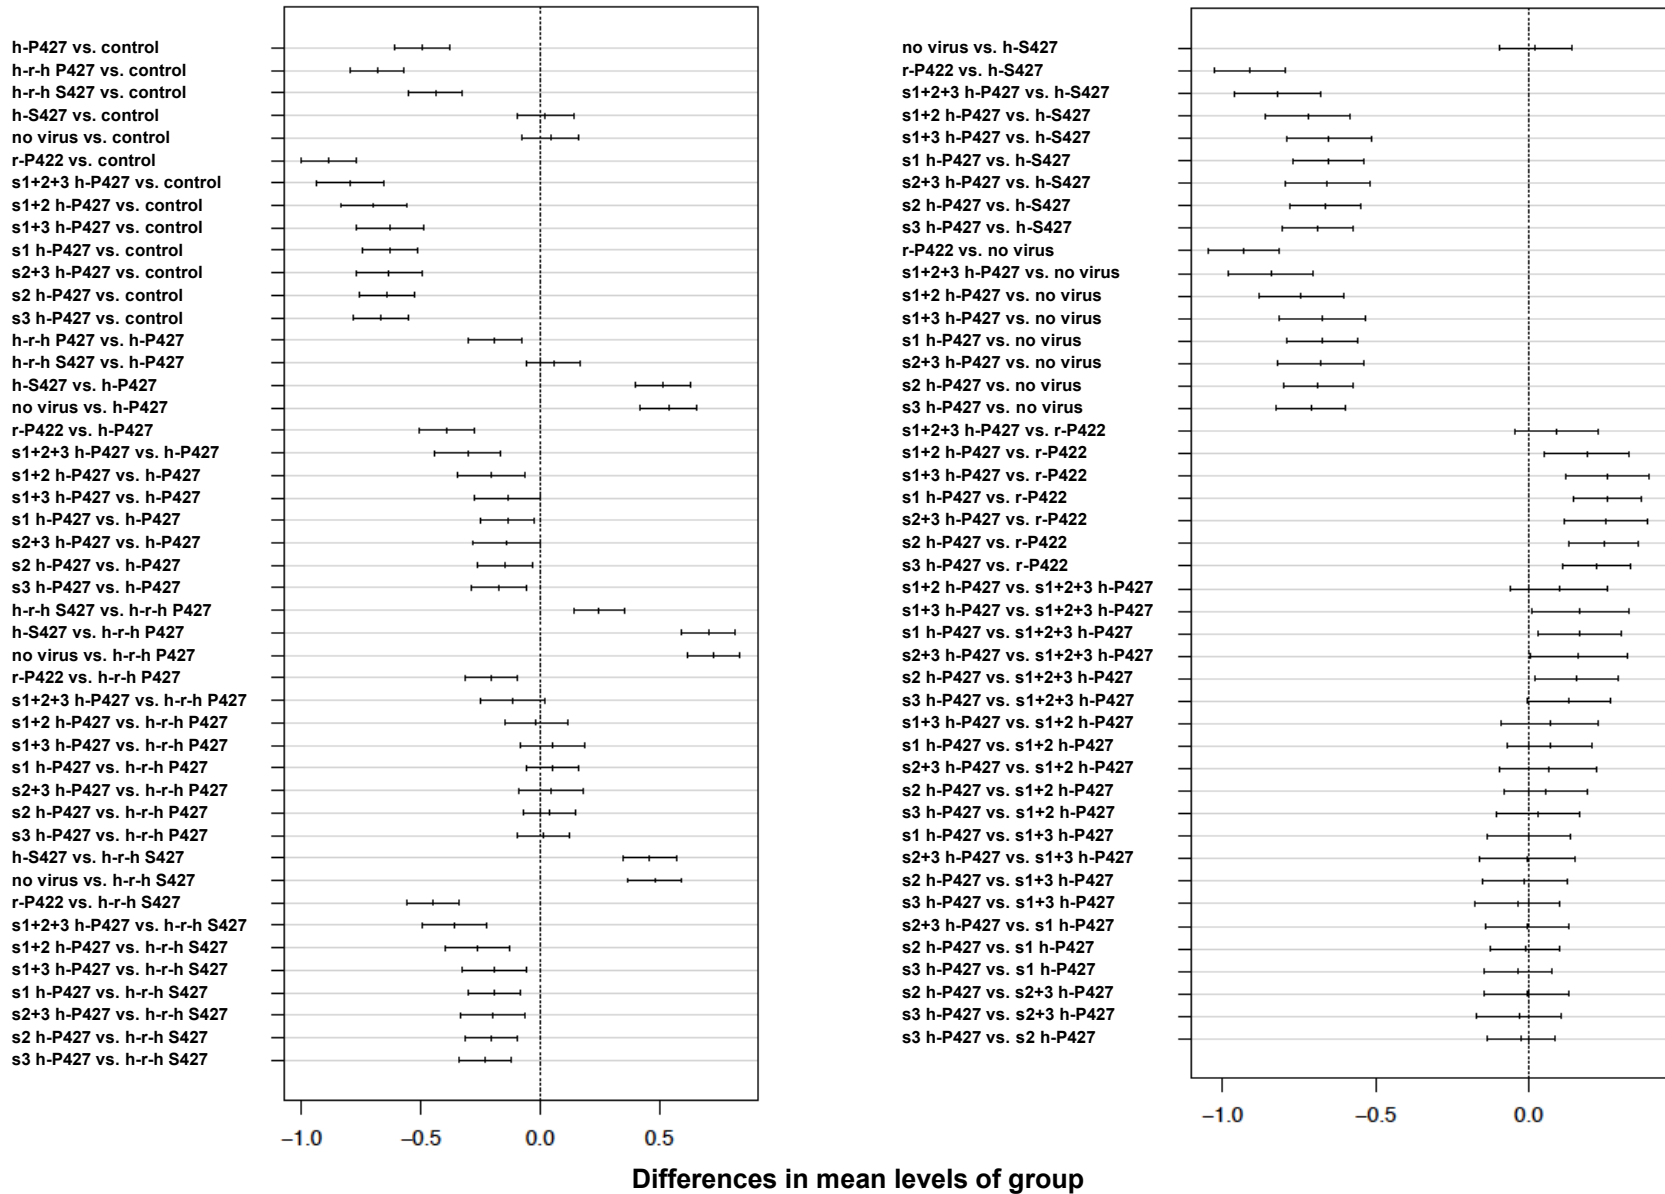

**Figure S16 - Statistical analysis for Figure 6B**

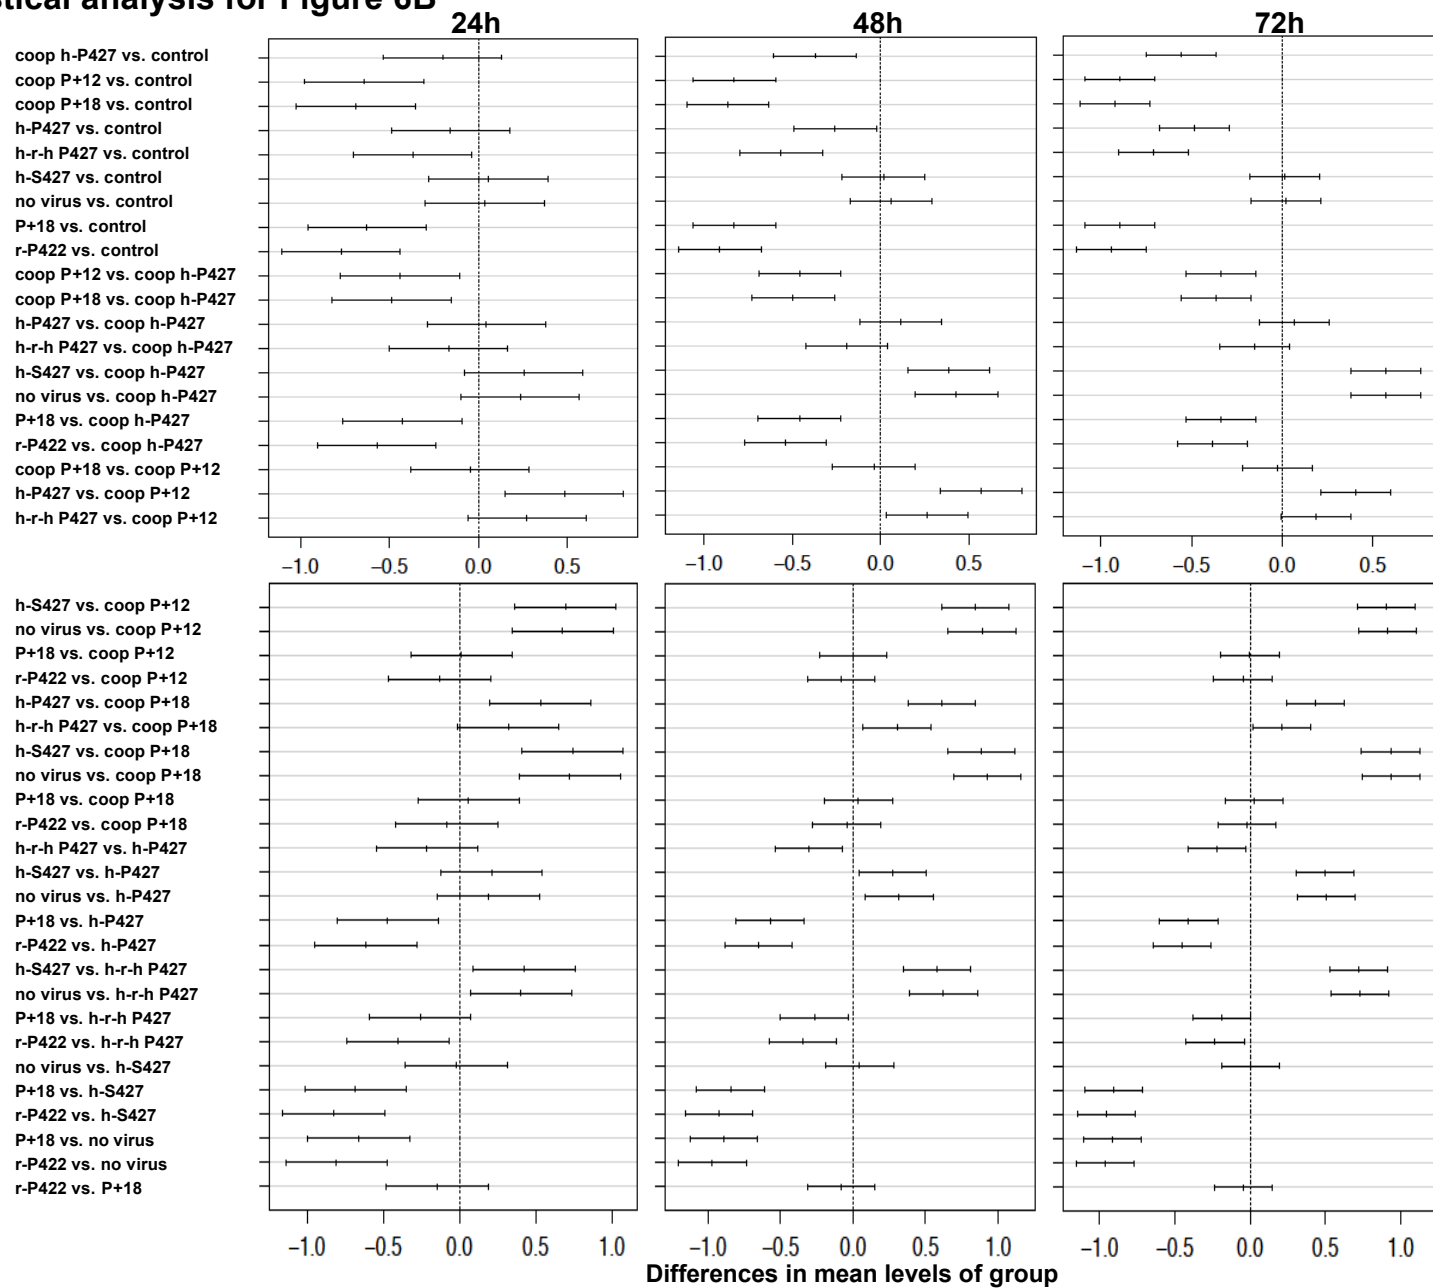



**Figure S17 - Statistical analysis for Figure 8**

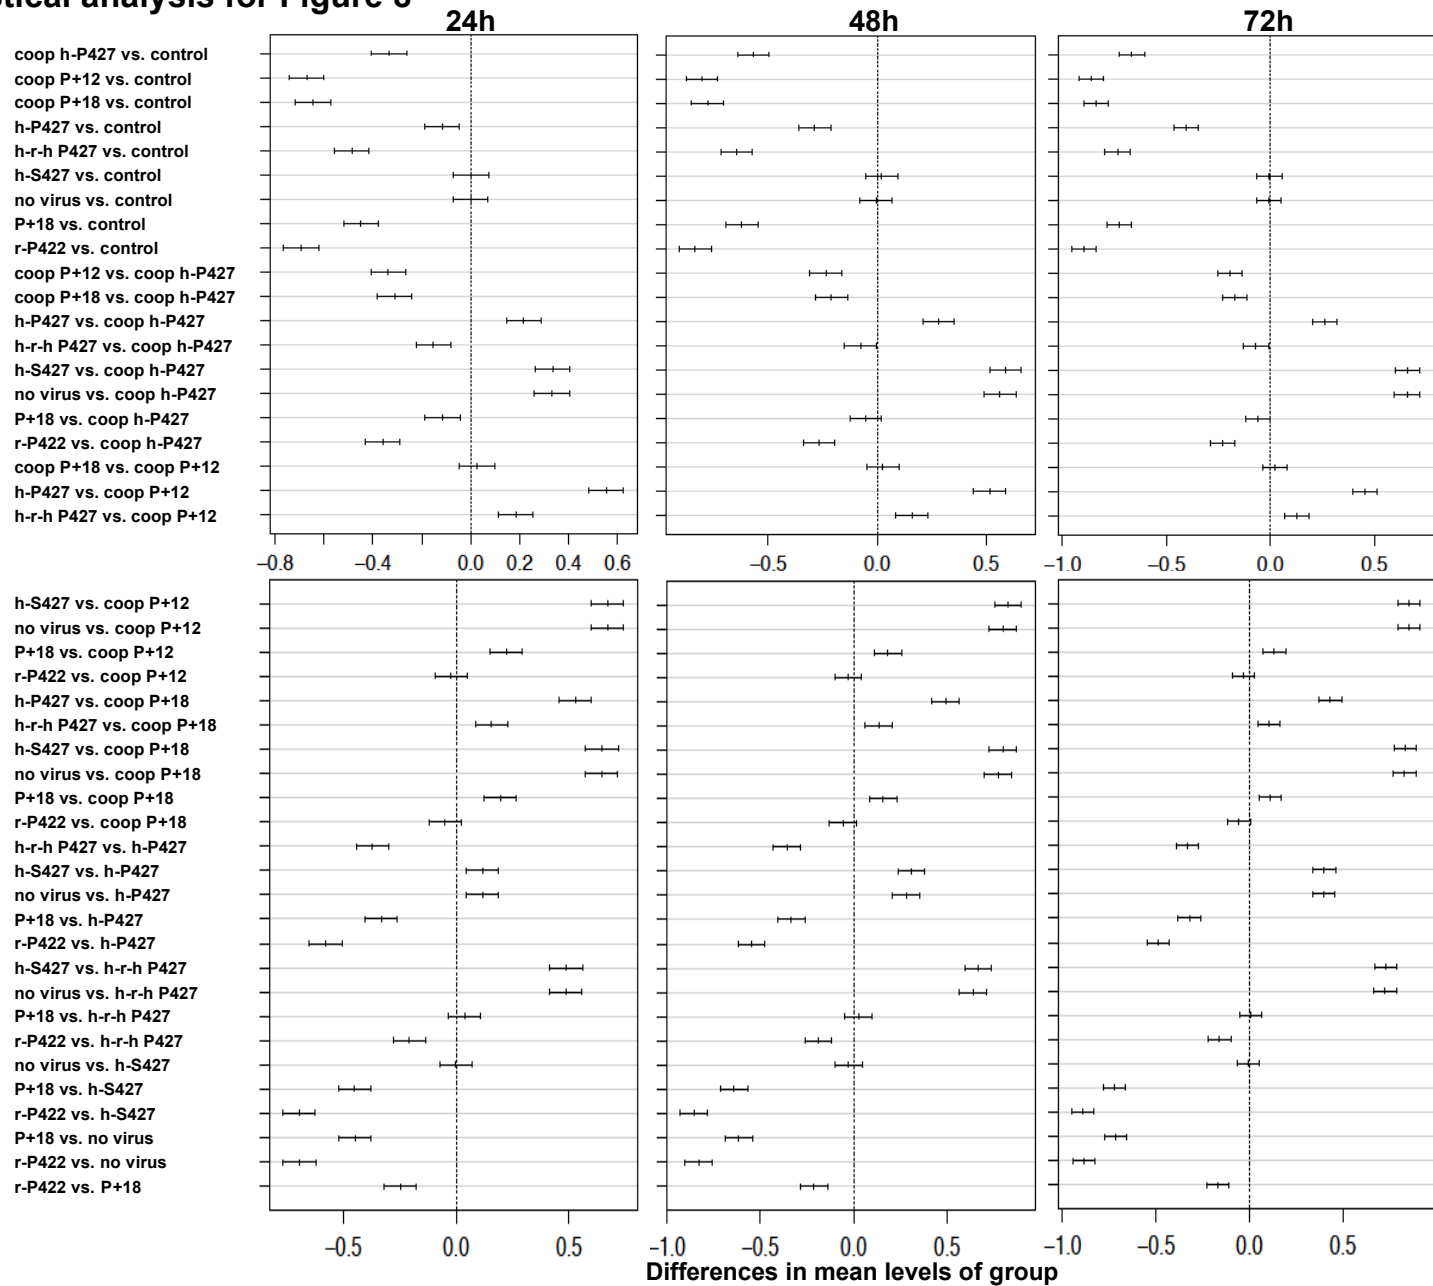

Figure S18 - Statistical analysis for Figure S3 (24h) - 1/2

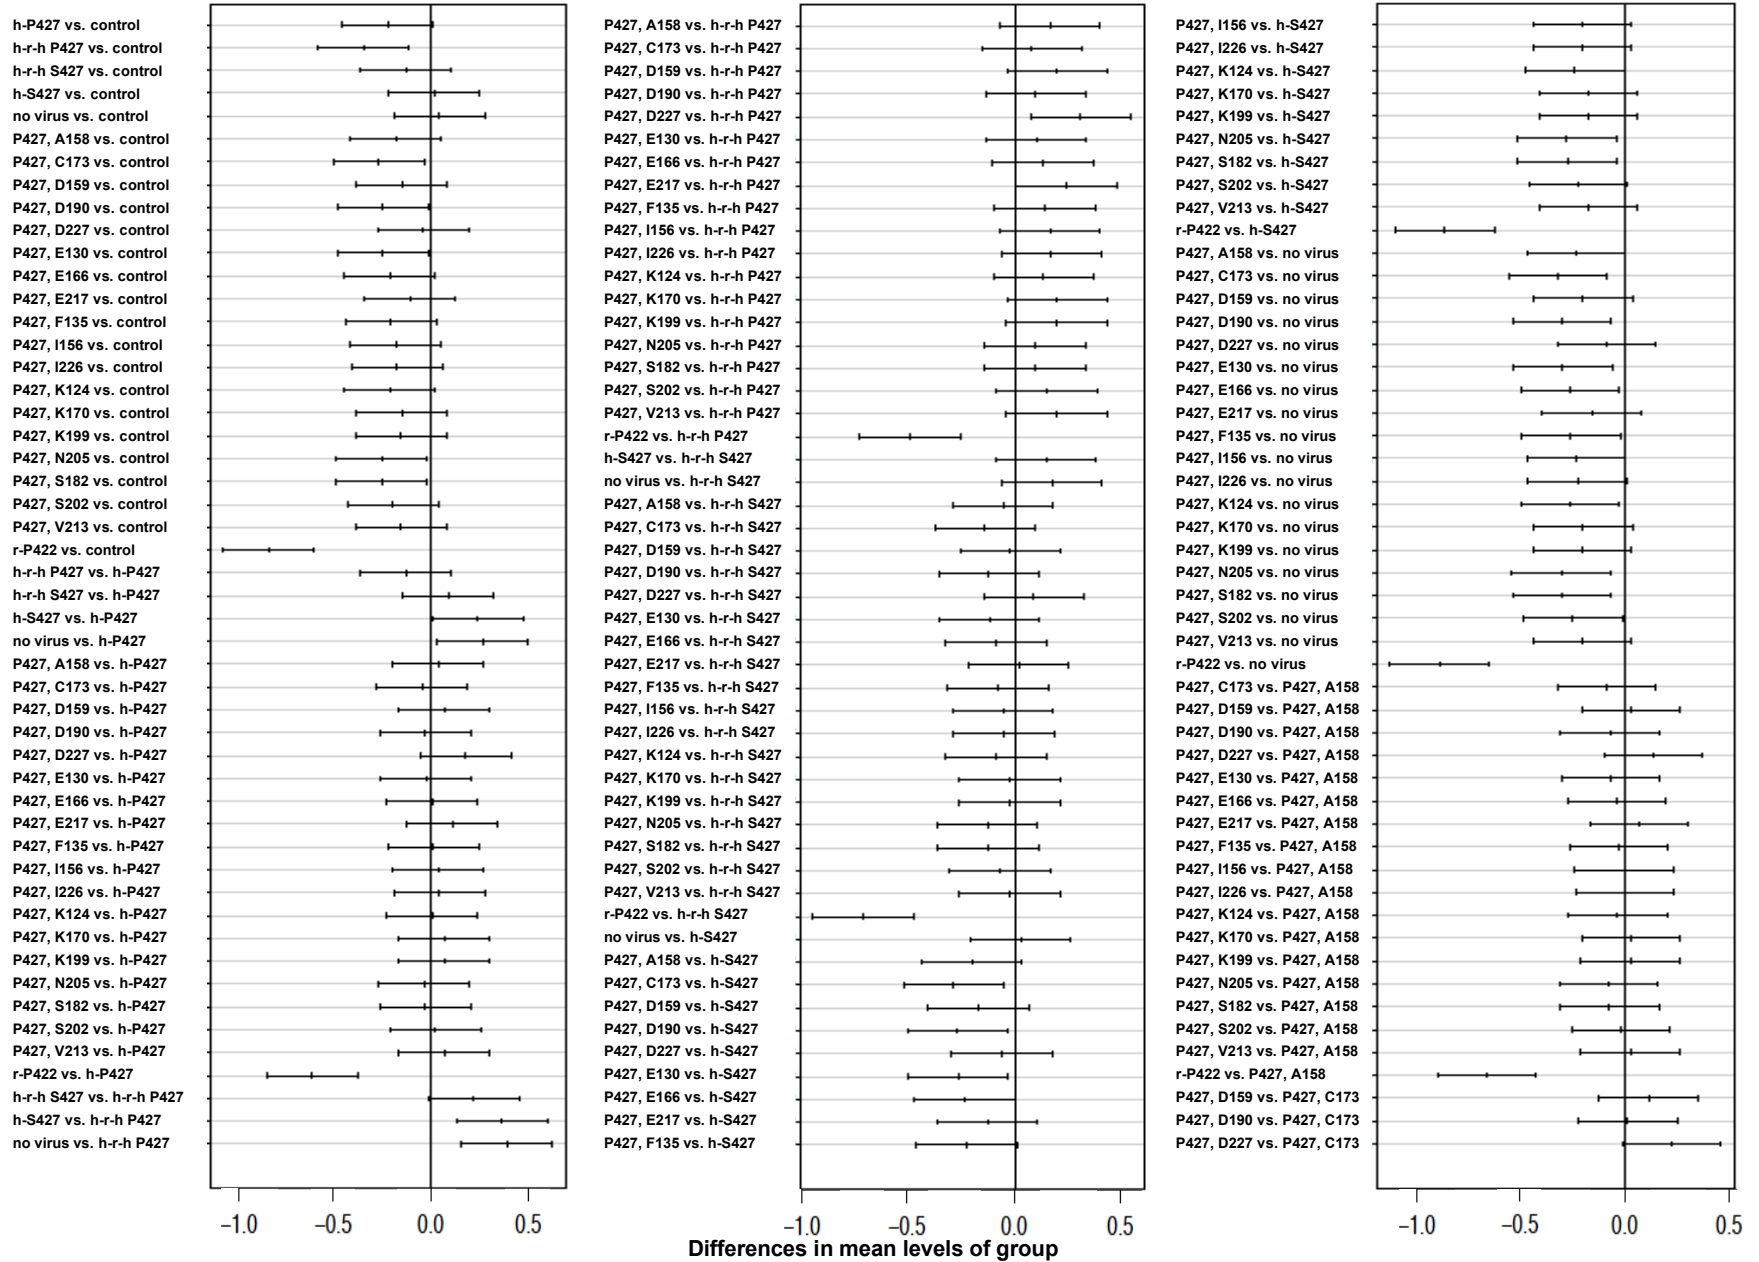

Figure S19 - Statistical analysis for Figure S3 (24h) - 2/2

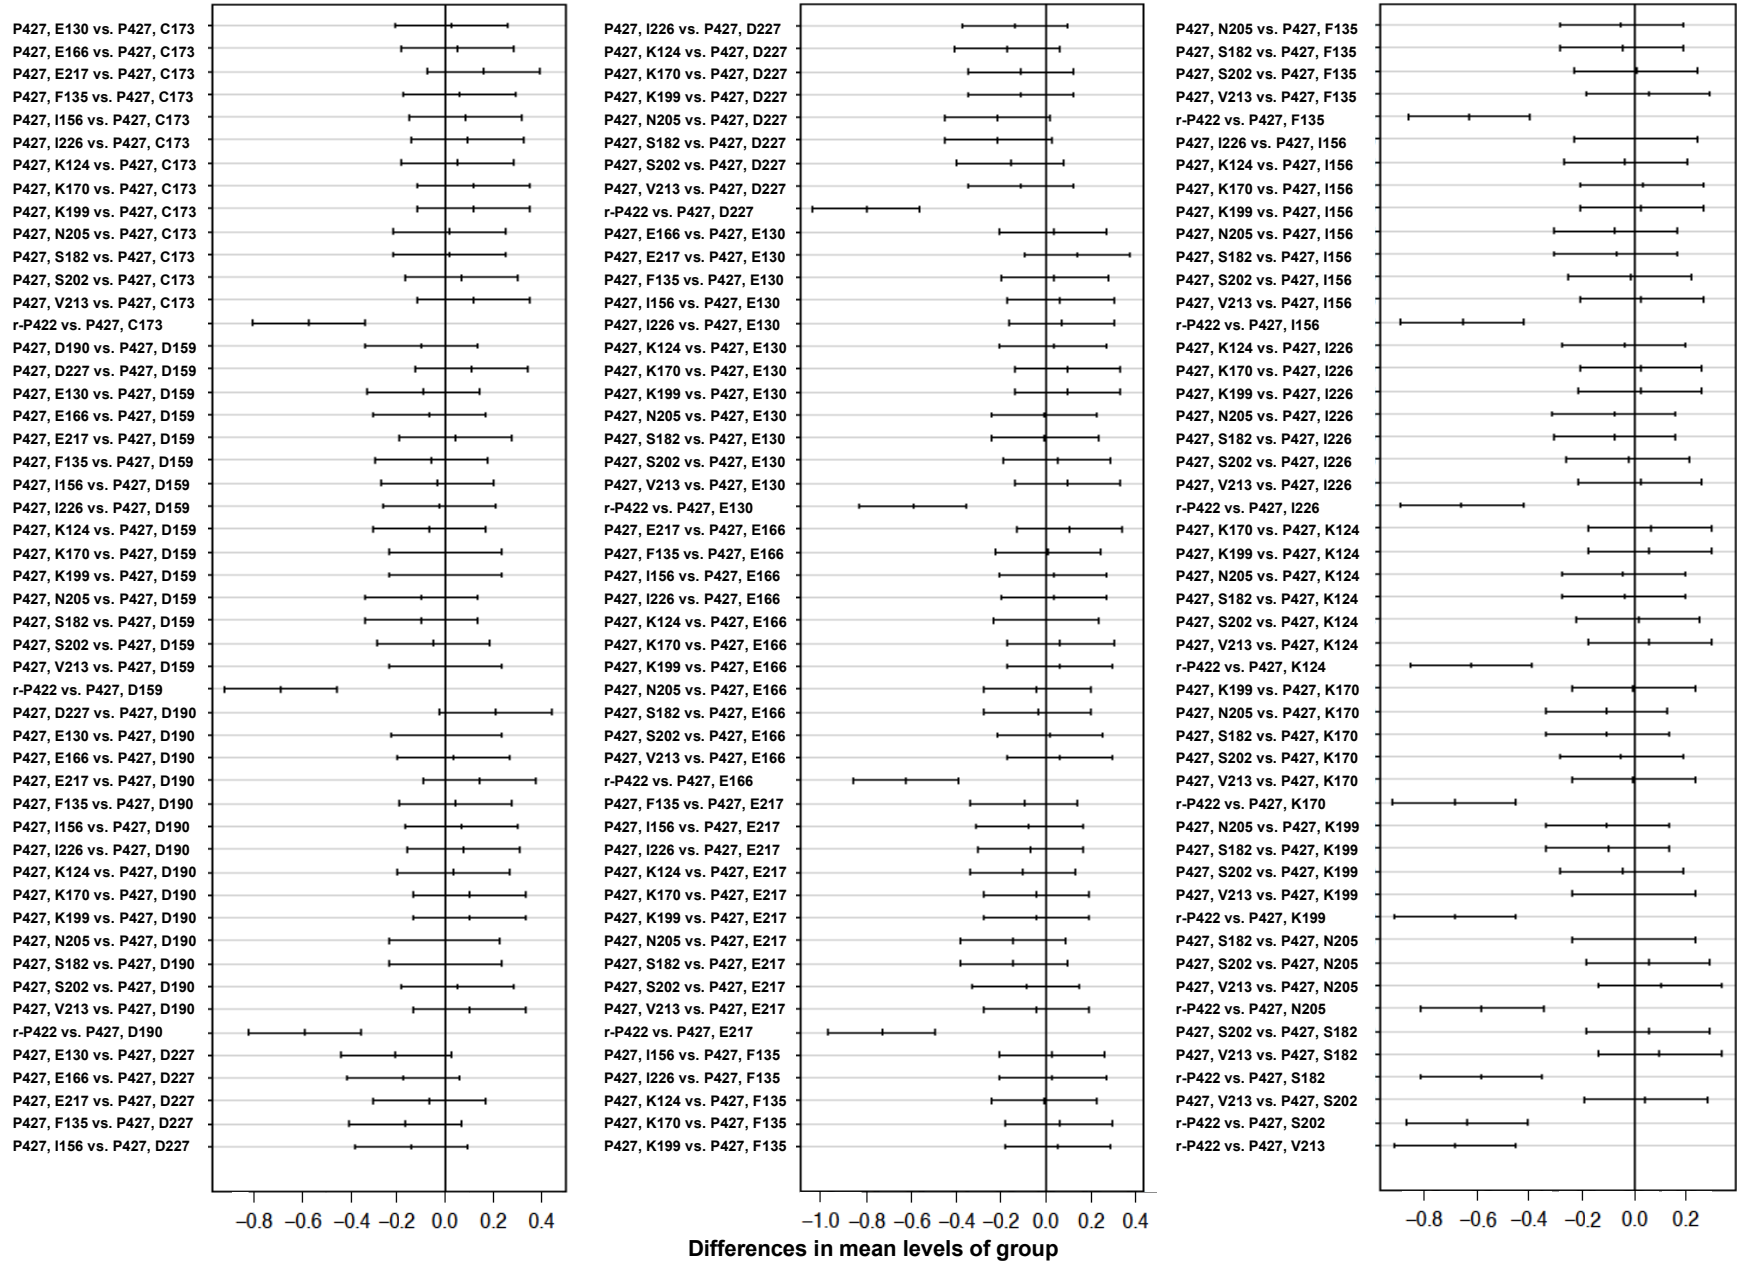

Figure S20 - Statistical analysis for Figure S3 (48h) - 1/2

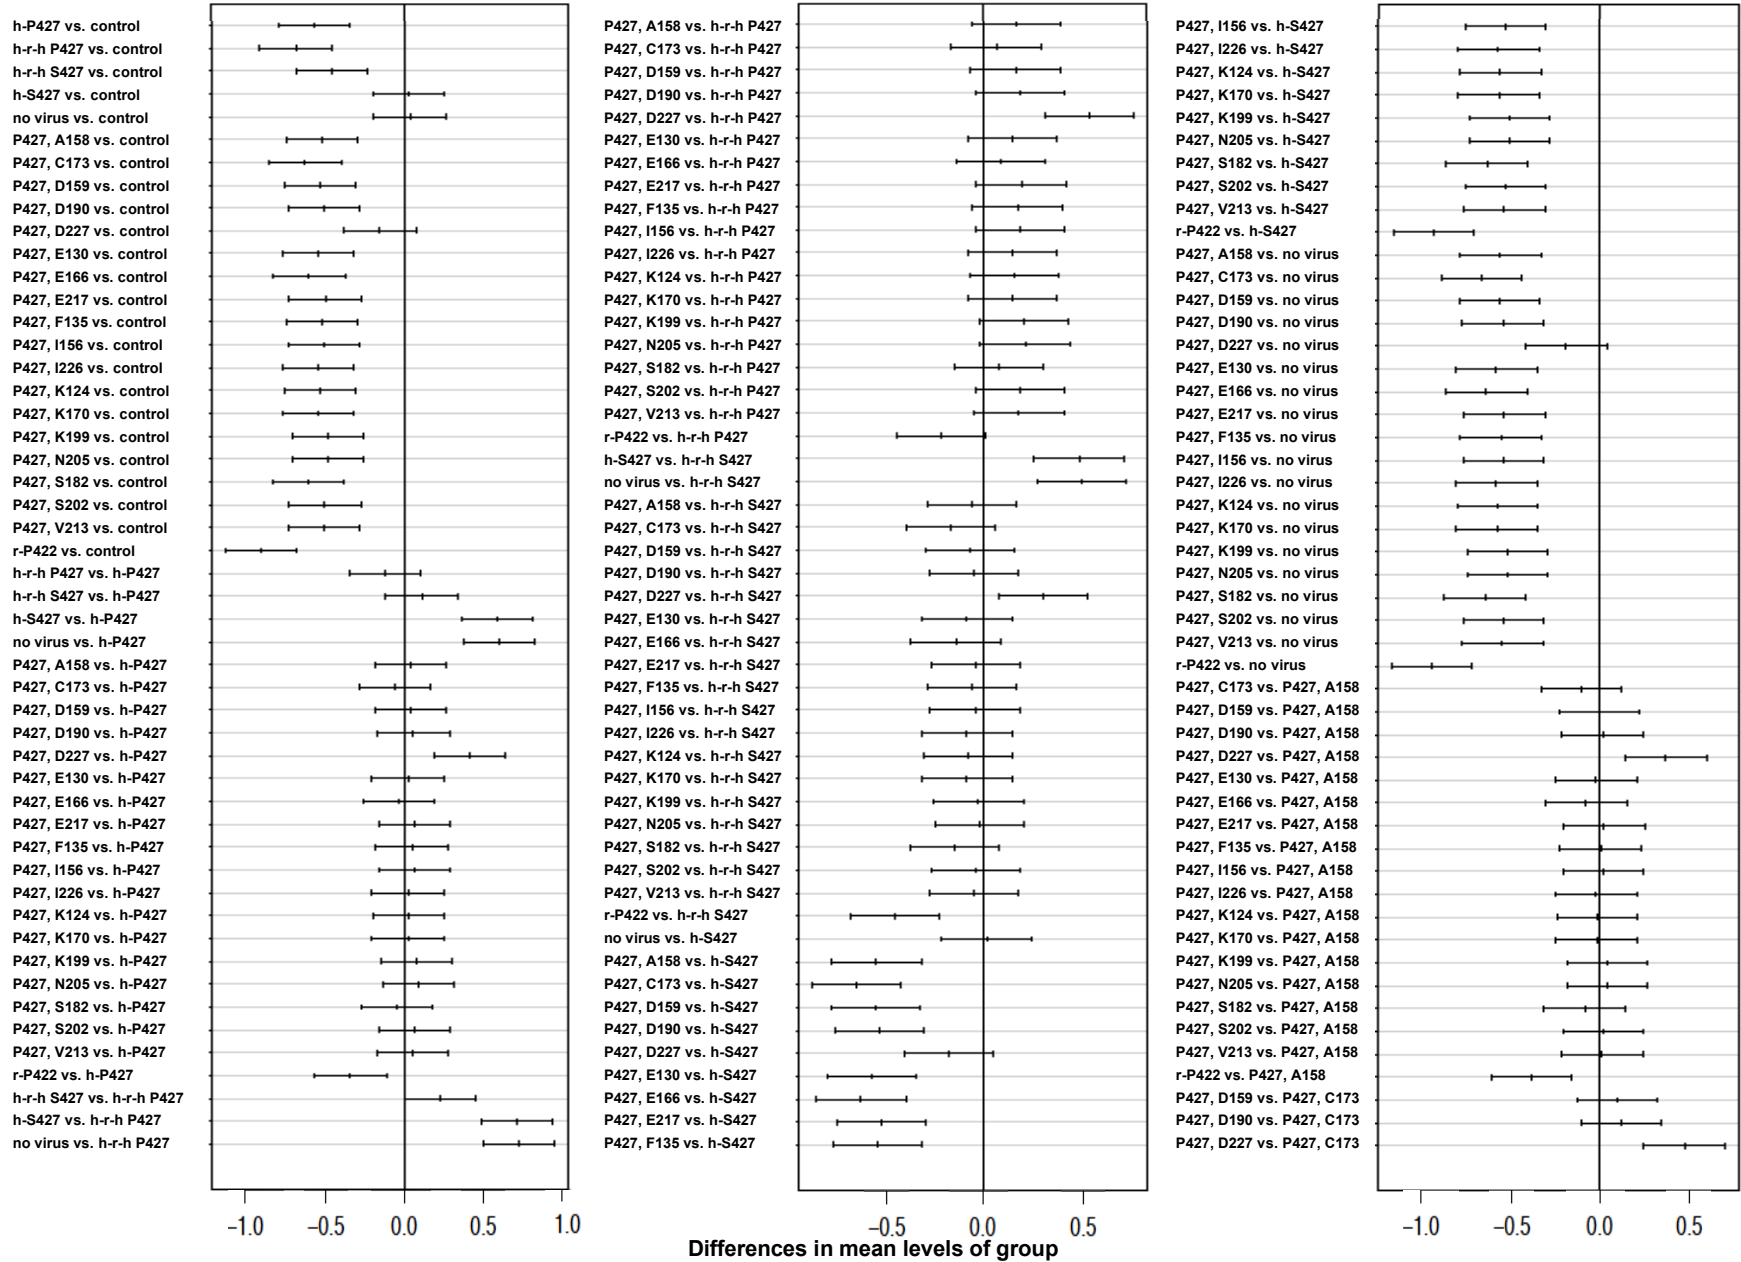

Figure S21 - Statistical analysis for Figure S3 (48h) - 2/2

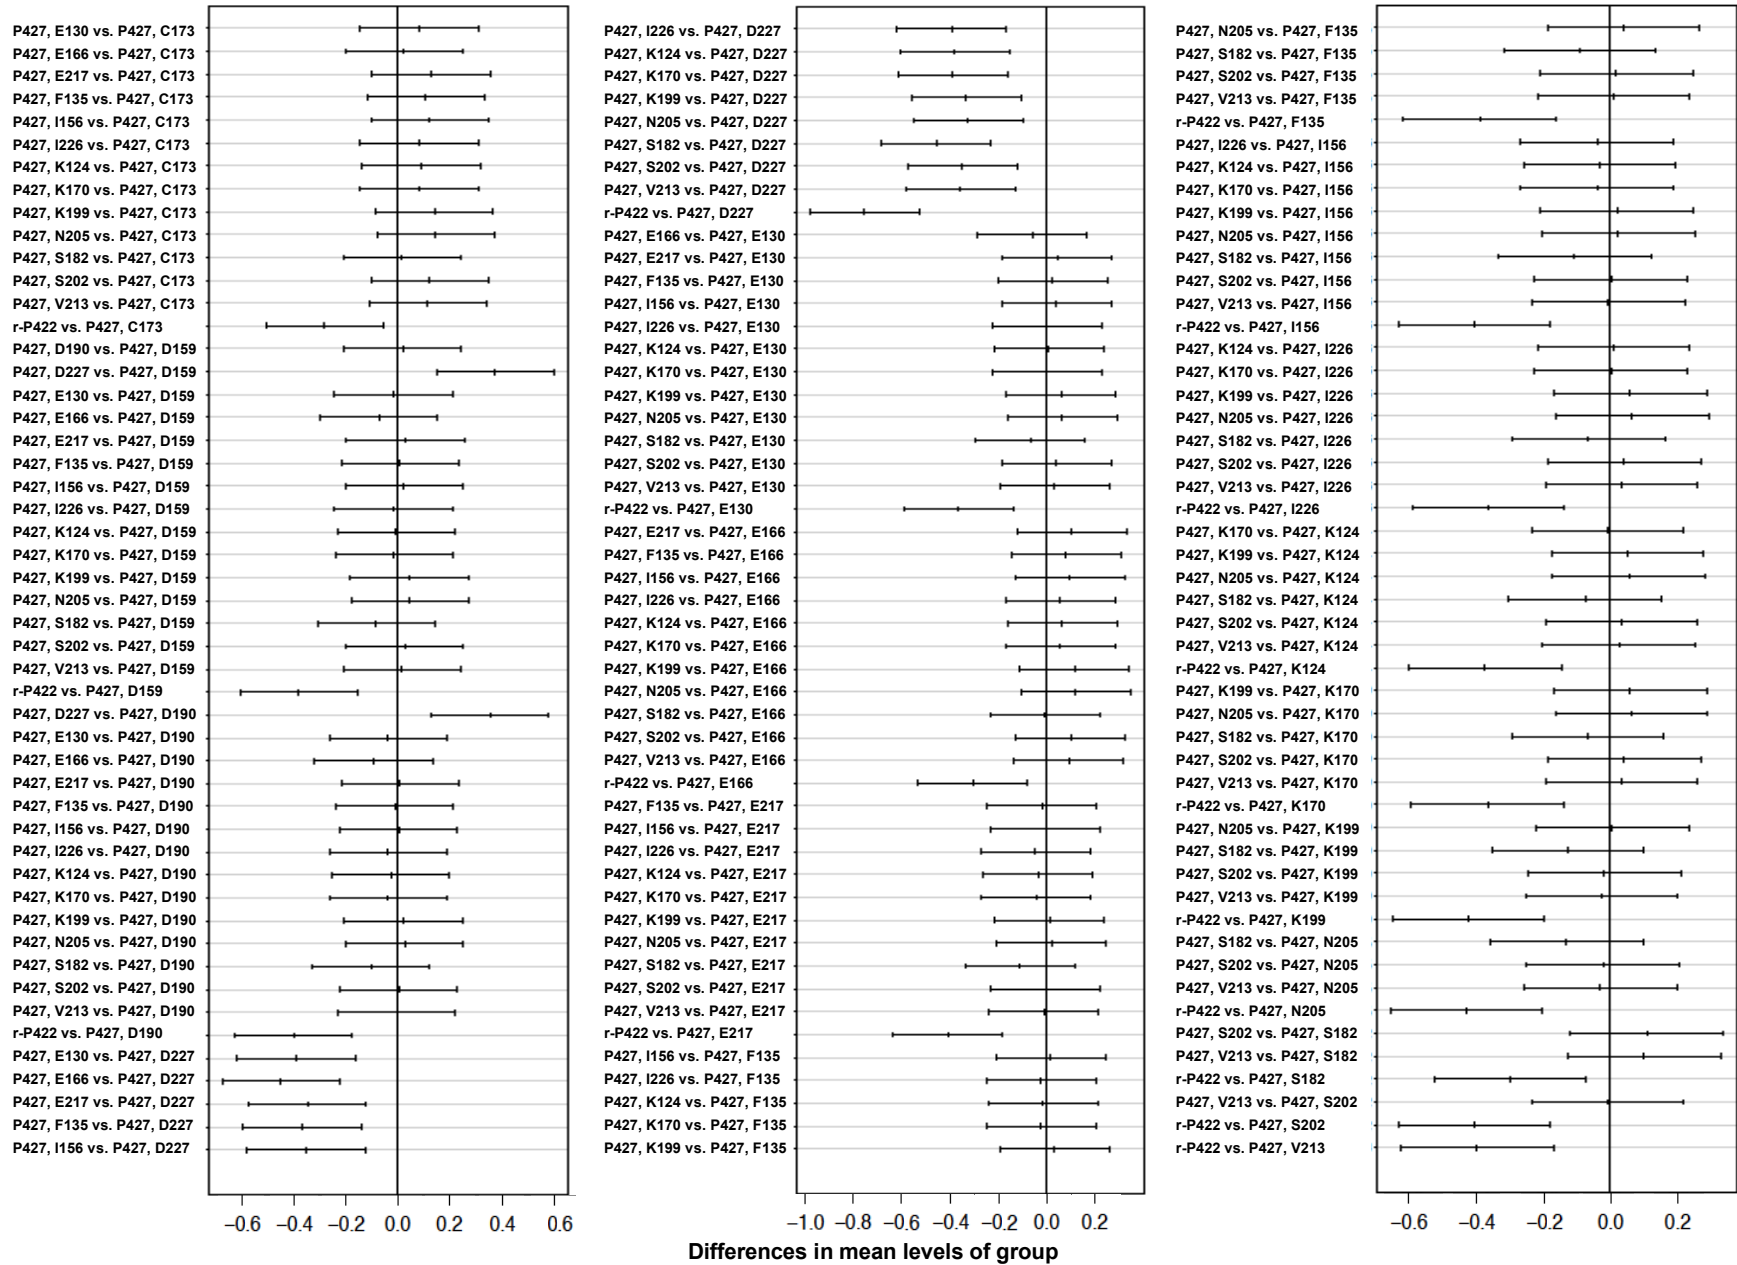

Figure S22 - Statistical analysis for Figure S3 (72h) - 1/2

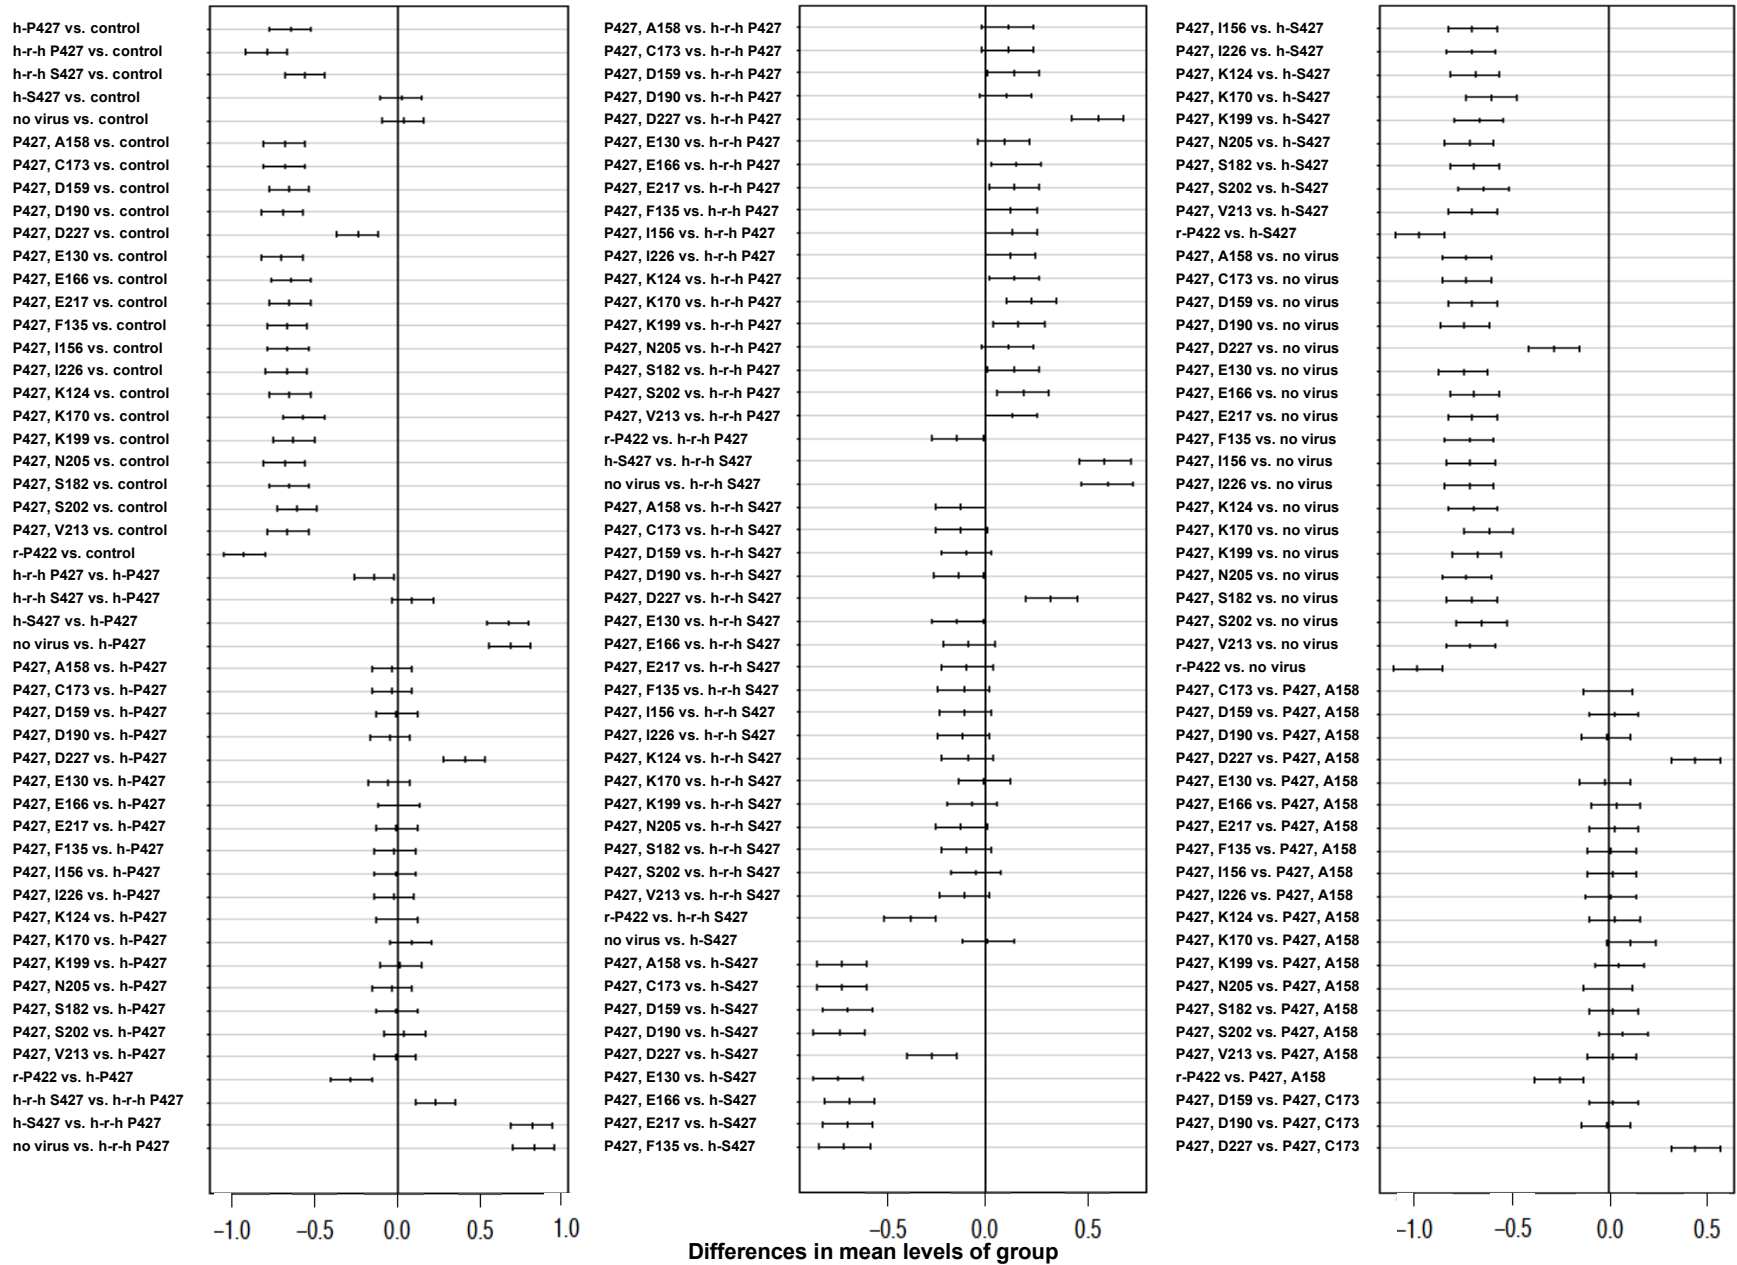

Figure S23 - Statistical analysis for Figure S3 (72h) - 2/2

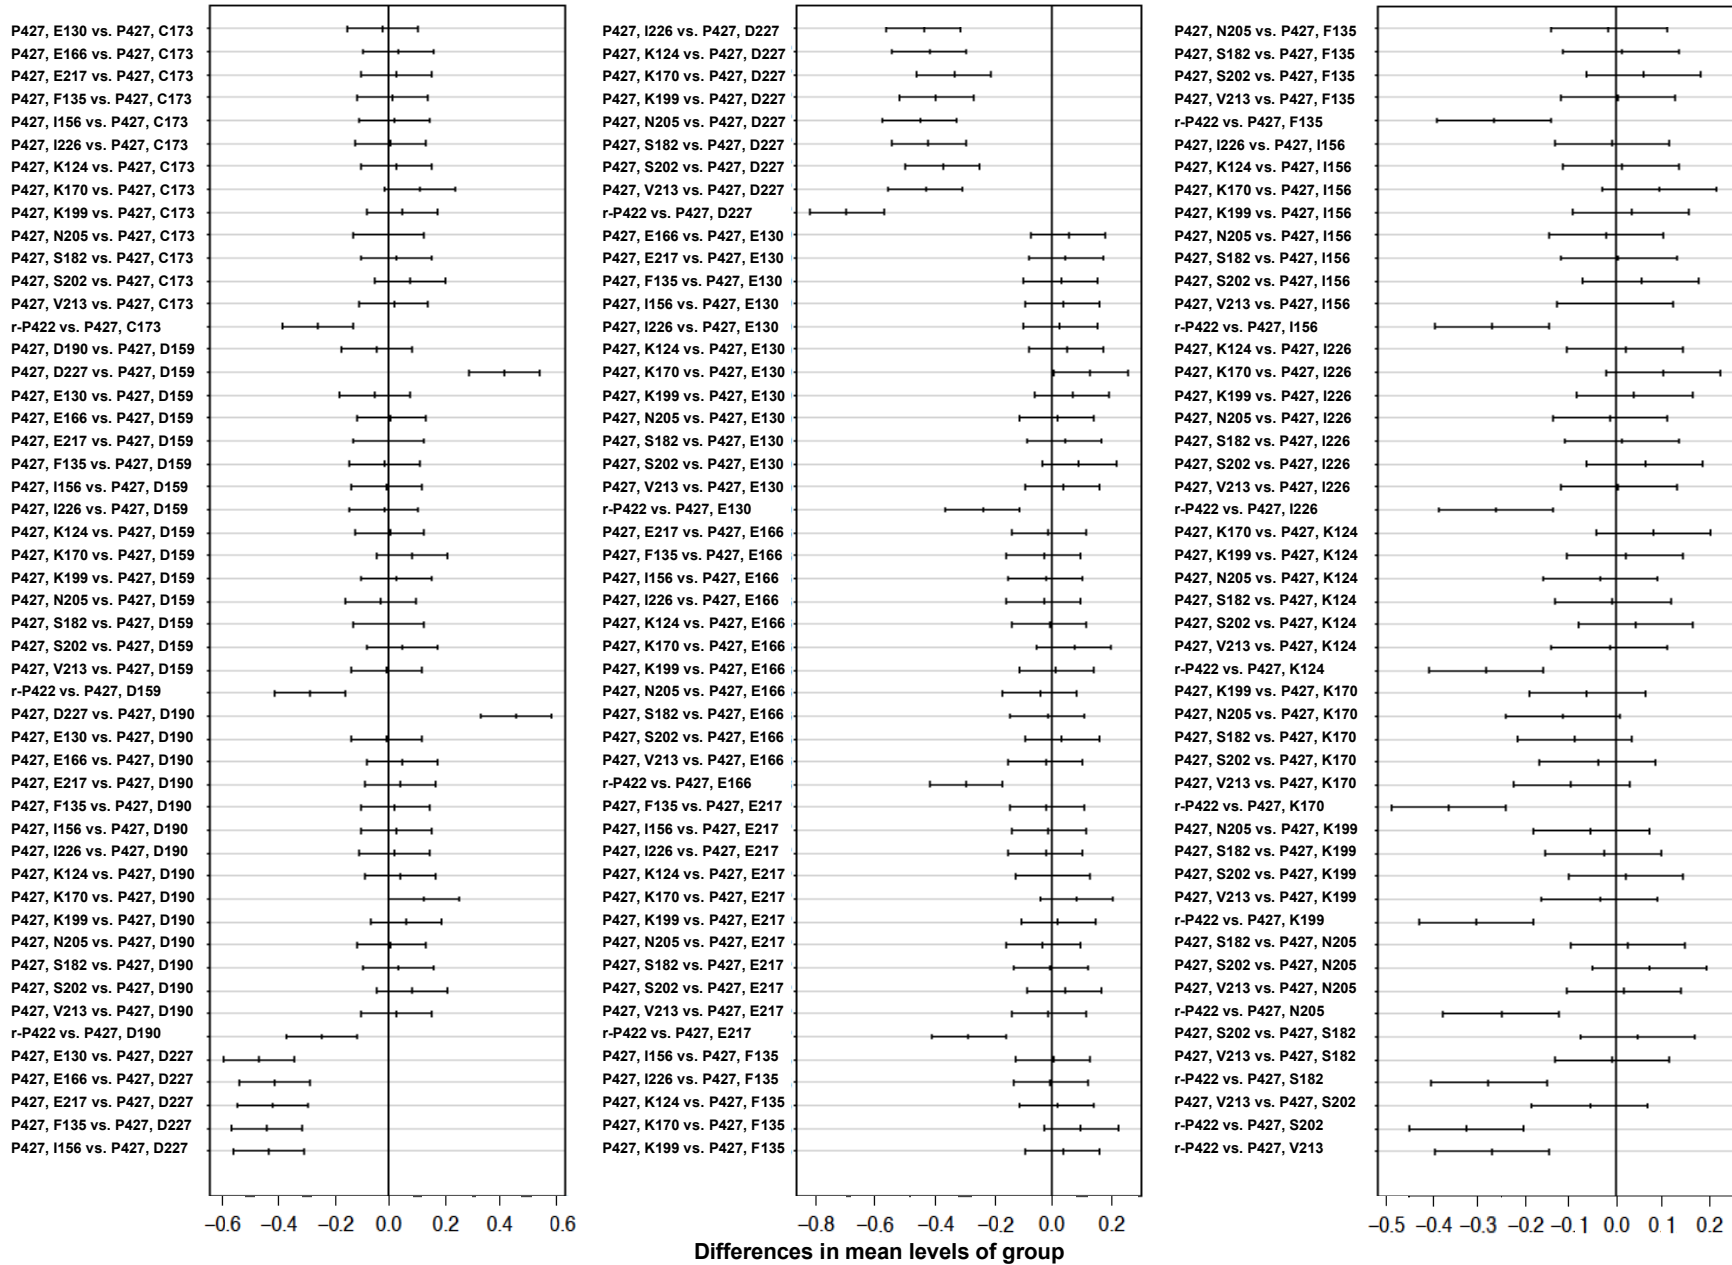

Supplement: NIHMS641644-supplement-Supplementary_Figures.pdf [file NIHMS641644-supplement-Supplementary_Figures.pdf]
